# Supplementary material
Source: PubMed Central journal article supplement (PMC5291023)
Supplement: supp_pp.16.01190_PP2016-01190R1_Supplemental_Material.pdf [file supp_pp.16.01190_PP2016-01190R1_Supplemental_Material.pdf]

# Supplemental Fig. S1

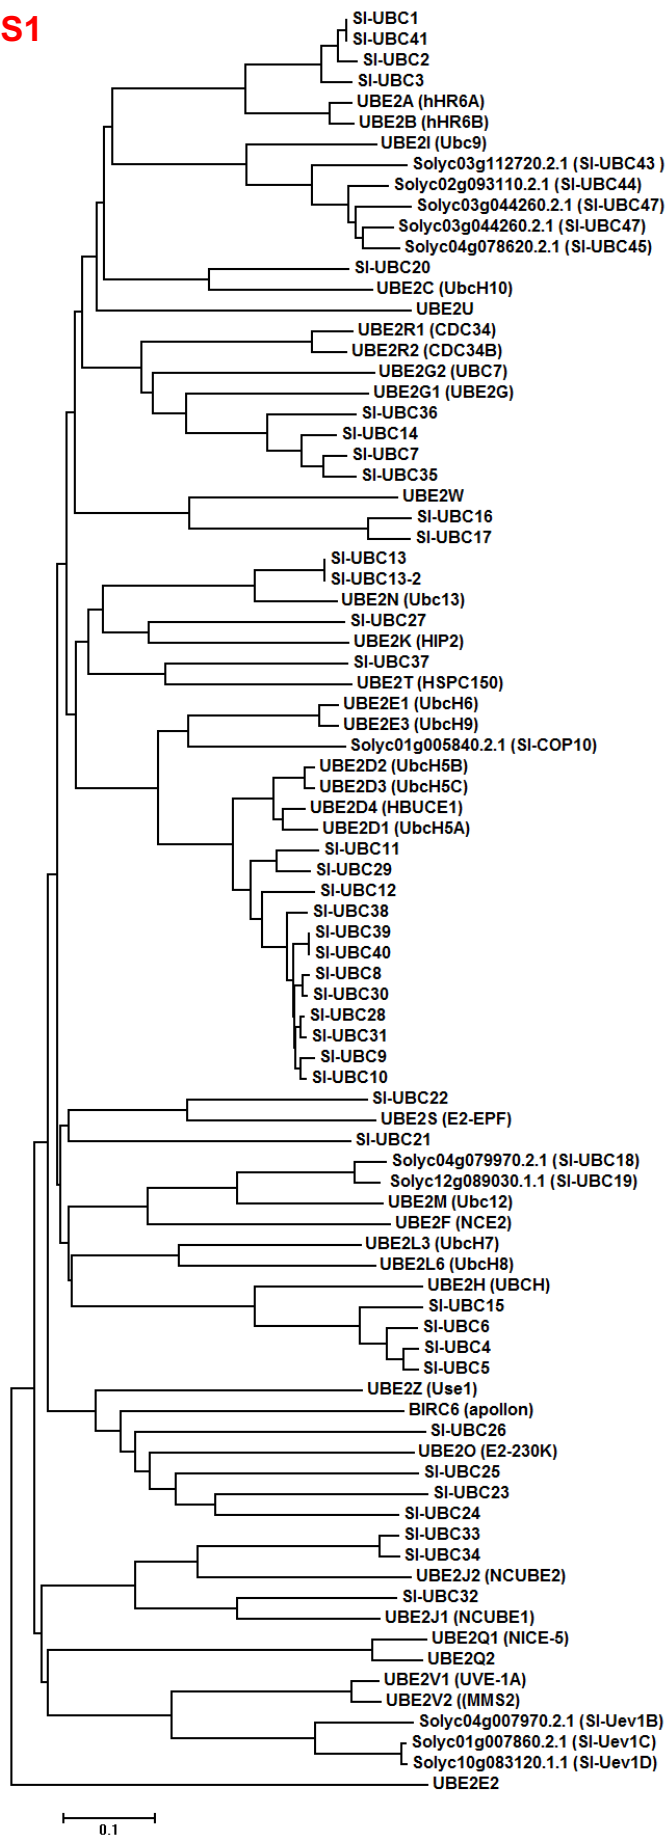

0.1

**Supplemental Figure S1. Phylogeny of the human and tomato UBC domain-containing proteins.** Phylogenetic analysis of the human and tomato UBC domain-containing proteins was performed using the same method and bootstrap trials as described for Figure 1. The phylogenetic tree is drawn to scale, with branch lengths in the same units as those of the evolutionary distances used to infer the phylogenetic tree. Accession numbers of the tomato and human UBC domain-containing proteins are shown in the Supplemental Table I.

## Supplemental Fig. S2

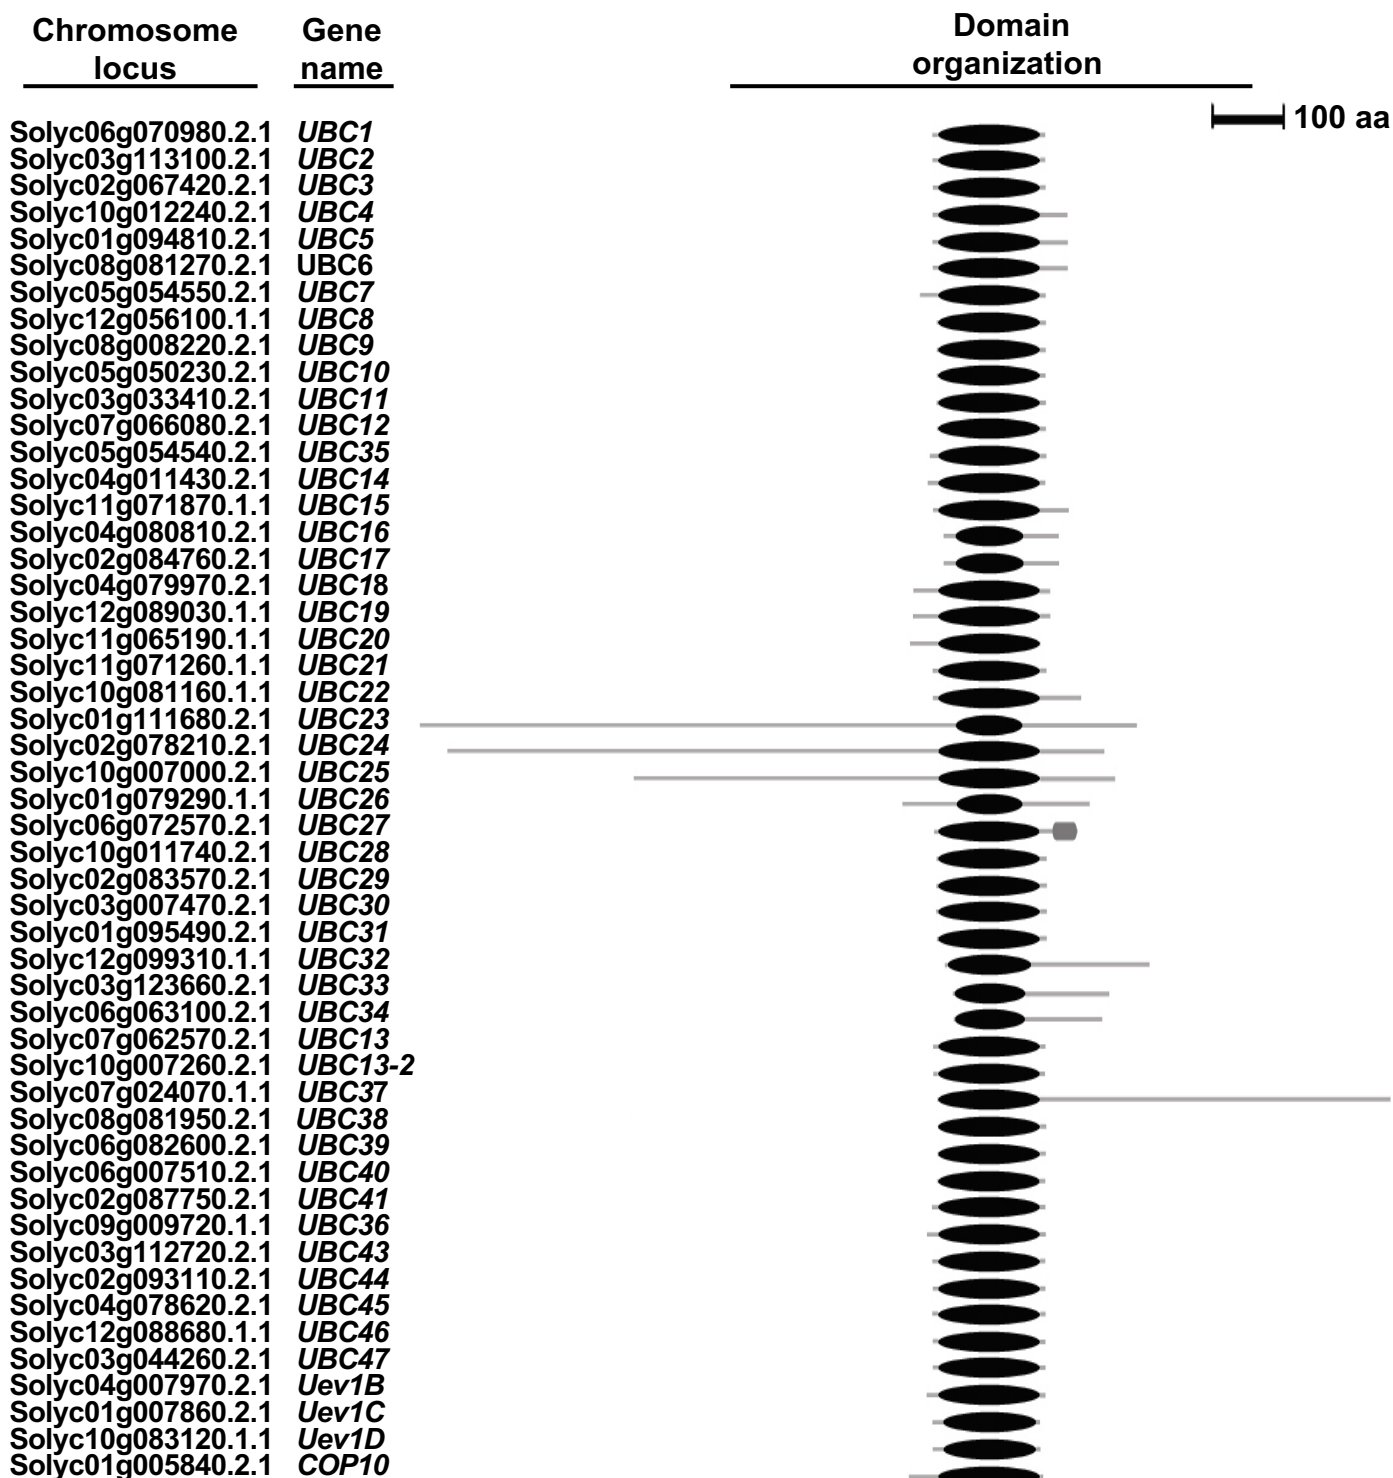

**Supplemental Figure S2. Schematic representation of domain organization in the tomato UBC domain-containing proteins.** The chromosomal loci and given gene names encoding the UBC domain-containing proteins are shown on the left side. The UBC fold and the extension of the UBC domain-containing proteins are represented as dark ellipse and light-gray line, respectively, both of which are drawn in scale to their length in the number of amino acids. The UBA domain of SI-UBC27 is indicated as a dark-gray rectangle. The scale bar represents length of protein in amino acids.



Supplemental Fig. S3

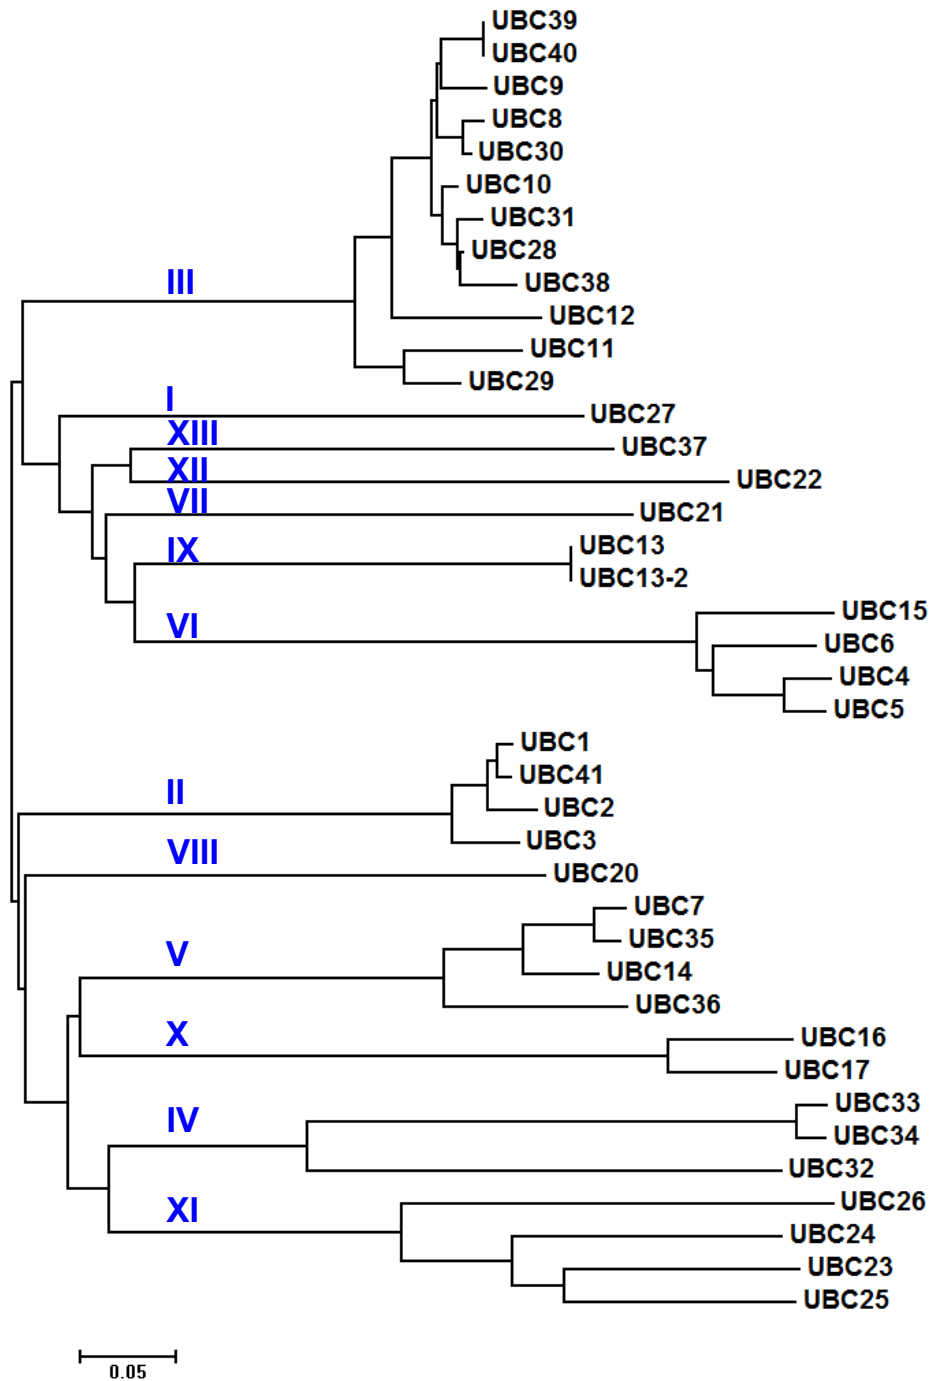

**Supplemental Figure S3. The tomato ubiquitin E2 enzymes are classified into thirteen subgroups.** Numbering of the groups was based on both the phylogenetic analysis of tomato ubiquitin E2s and the previously reported classification of Arabidopsis ubiquitin E2s (Zhao et al., 2013). Phylogenetic analysis of the forty tomato ubiquitin E2s using the amino acid sequence of core UBC domain was performed using the same method and bootstrap trials as described for Figure 1. The Roman numerals designate the different E2 groups.

**Supplemental Fig. S4**

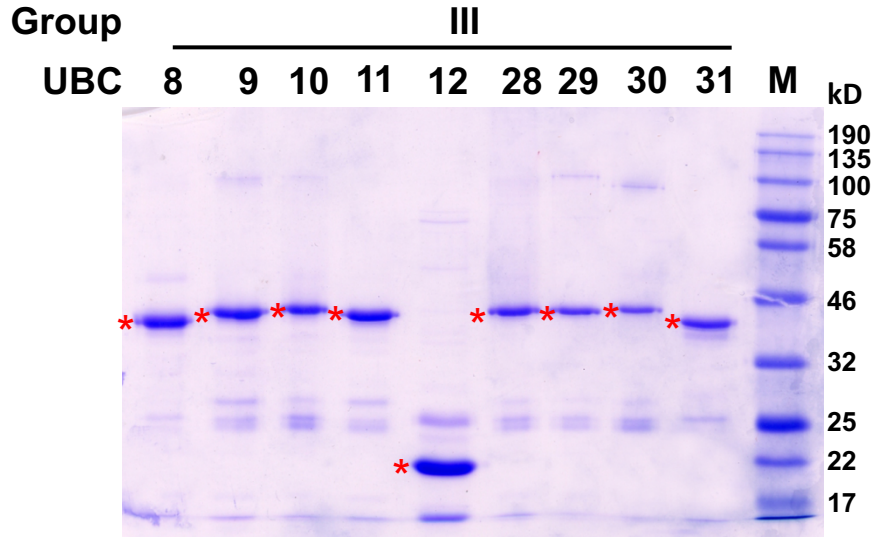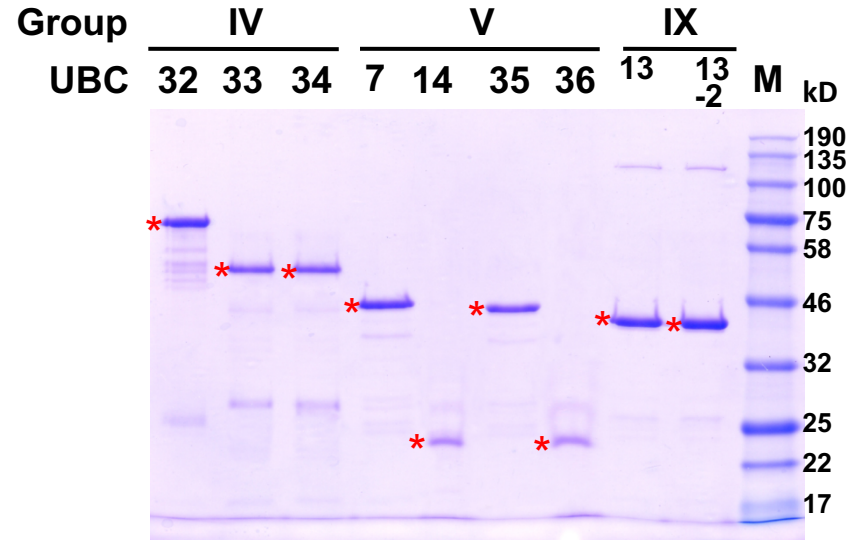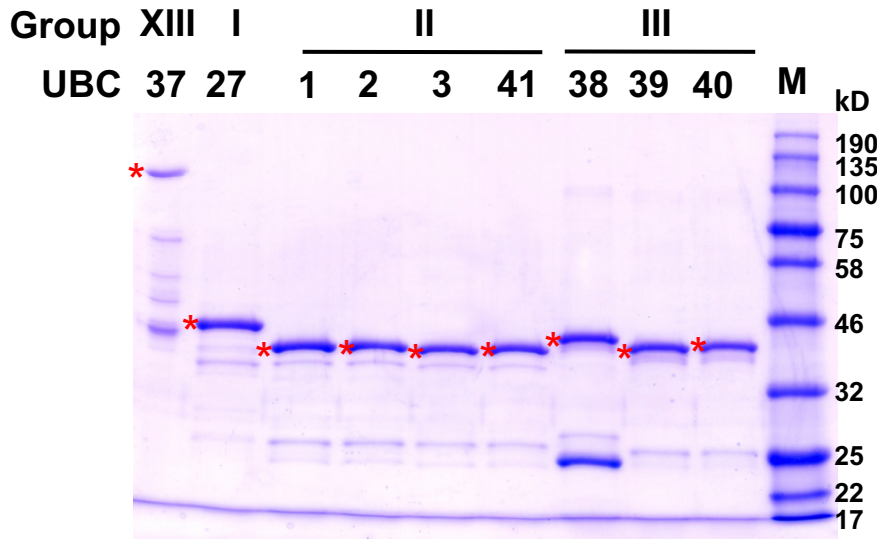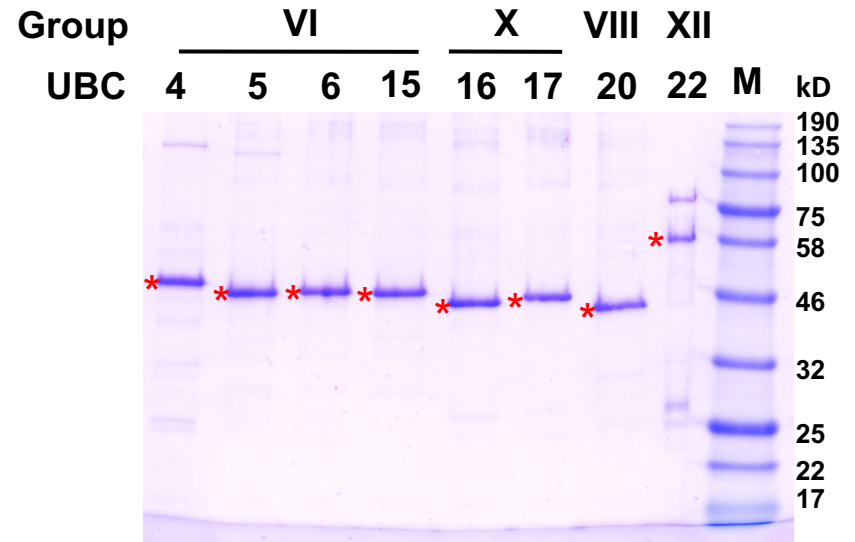

**Supplemental Figure S4. Purified tomato E2 proteins as shown by SDS-PAGE.**

Approximately 3  $\mu$ g of thirty-five purified E2 proteins were separated by 10% SDS-PAGE and stained with Coomassie Brilliant Blue. The Roman numerals designate the group into which the E2s are classified. M represents the molecular weight markers. The numbers on the right denote the molecular mass of marker proteins in kD. The asterisks denote the band of corresponding purified E2 proteins. Except for UBC12, 14 and 36 that are 6xHis-tagged, all E2s are fused to GST.

**Supplemental Fig. S5**

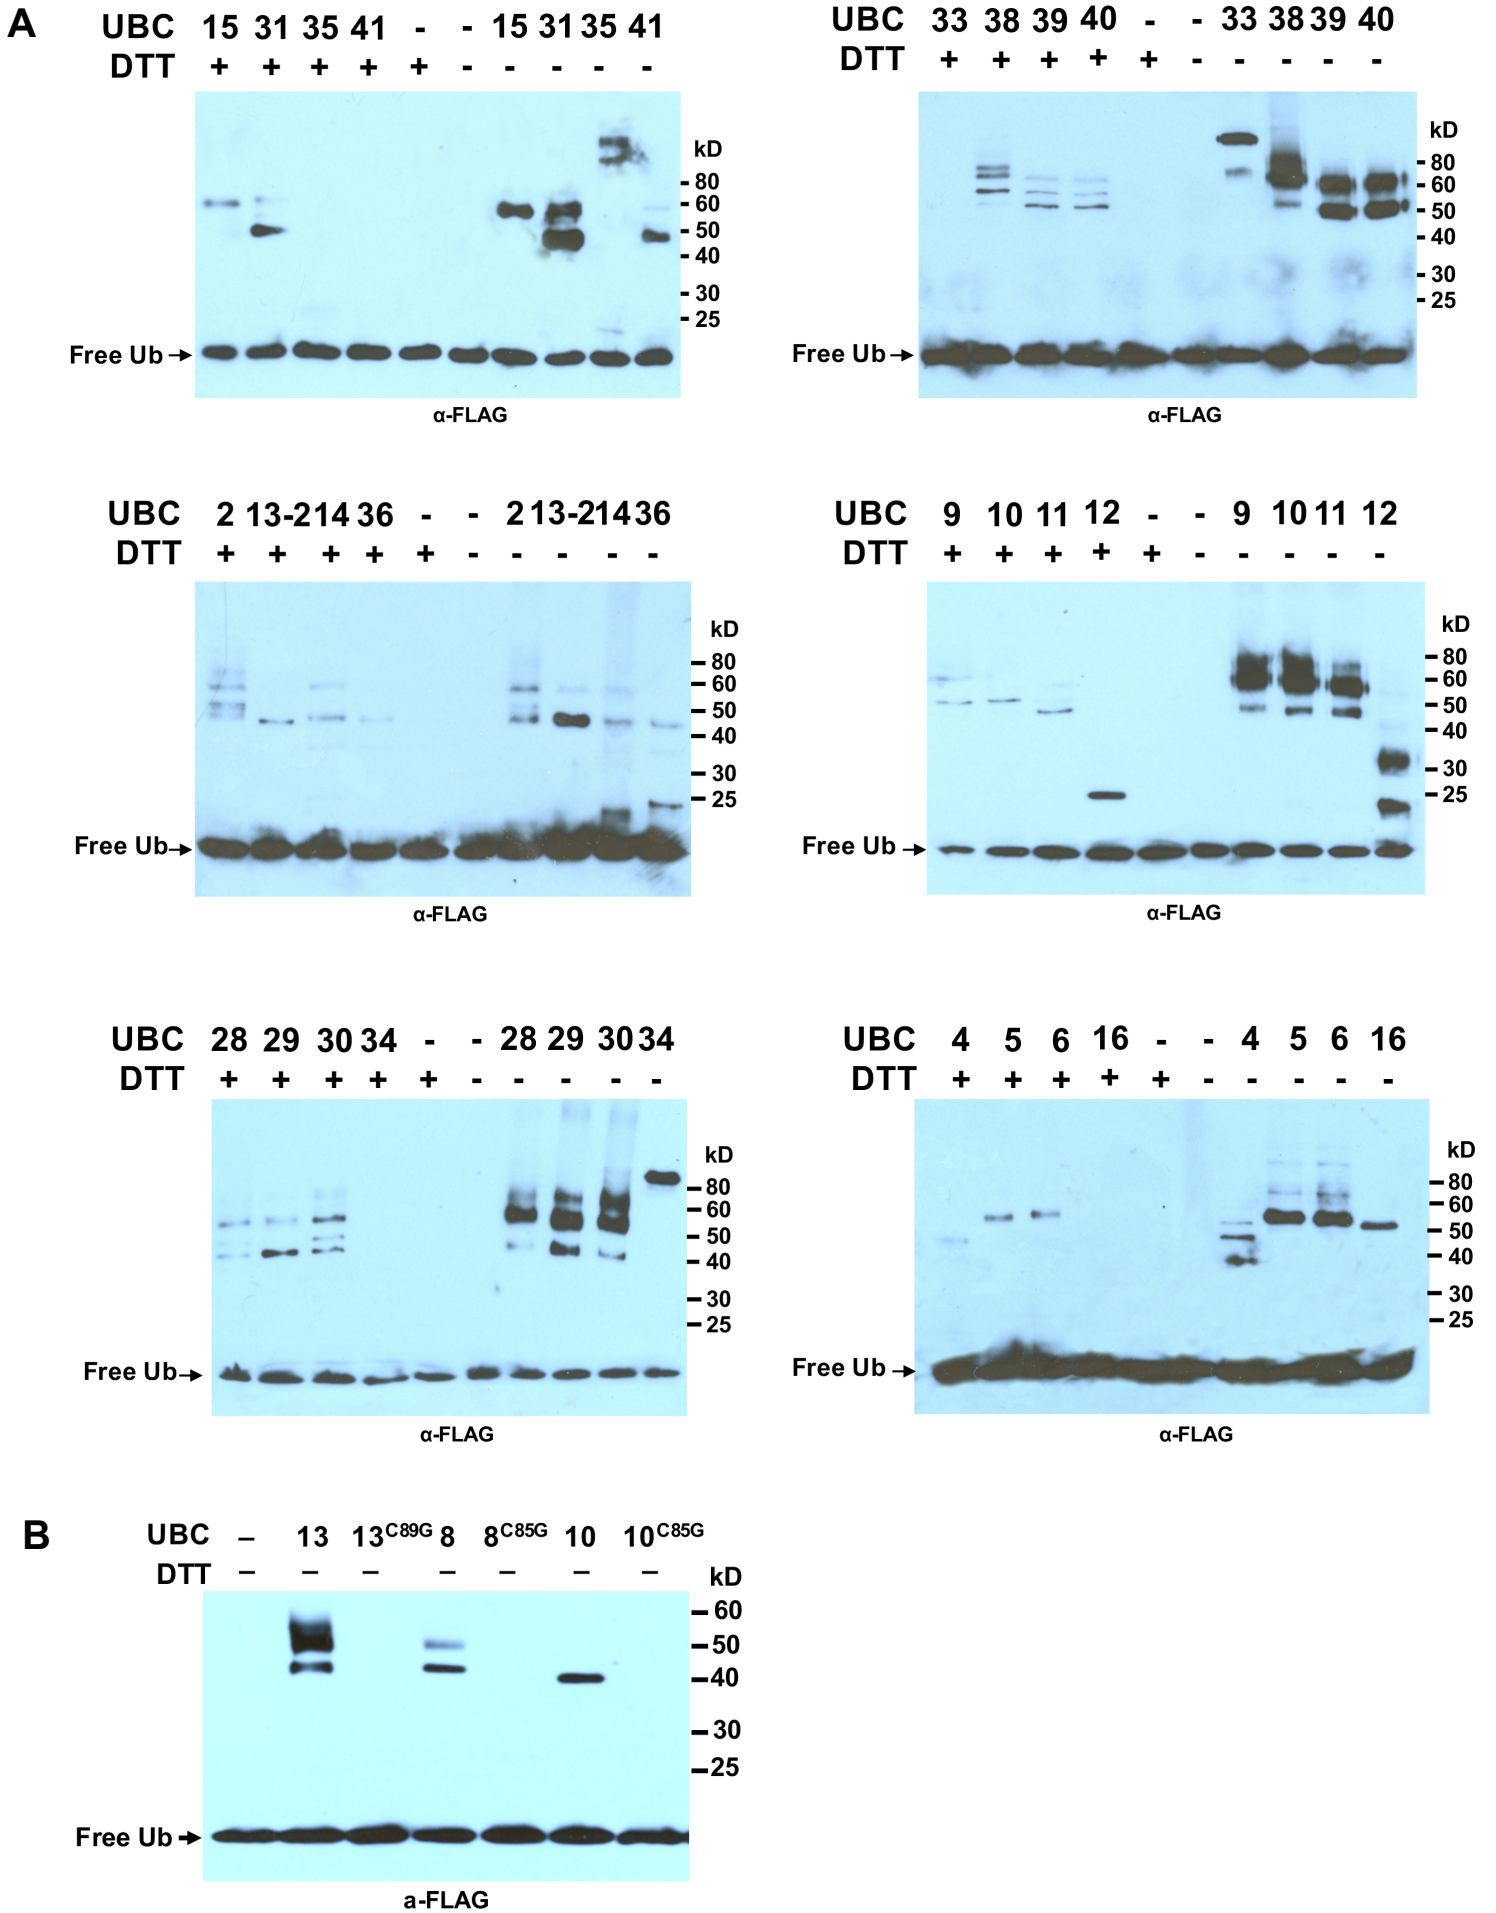

**Supplemental Figure S5. Examination of the ubiquitin-conjugating activity of tomato E2s by thioester formation assay.** (A) Anti-FLAG Western blots were performed following thioester assay of different tomato ubiquitin E2s. The reactions of the assay were terminated by adding SDS sample loading buffer in the presence of 100 mM DTT (DTT +) or 4M Urea (DTT -). The formation of DTT-sensitive ubiquitin adducts by tomato E2s is shown as charged E2. The numbers on the right denote the molecular mass of marker proteins in kD. The experiment was repeated two times with similar results. (B) Tomato E2 mutants in which the cysteine residue at the active site mutated lost ubiquitin-conjugating activity. Thioester assay was performed using wild type tomato ubiquitin E2s and E2 mutants. The reactions of the assay were terminated by adding SDS sample loading buffer in the presence of 4M Urea (DTT-). The numbers on the right denote the molecular mass of marker proteins in kD. The experiment was repeated two times with similar results.

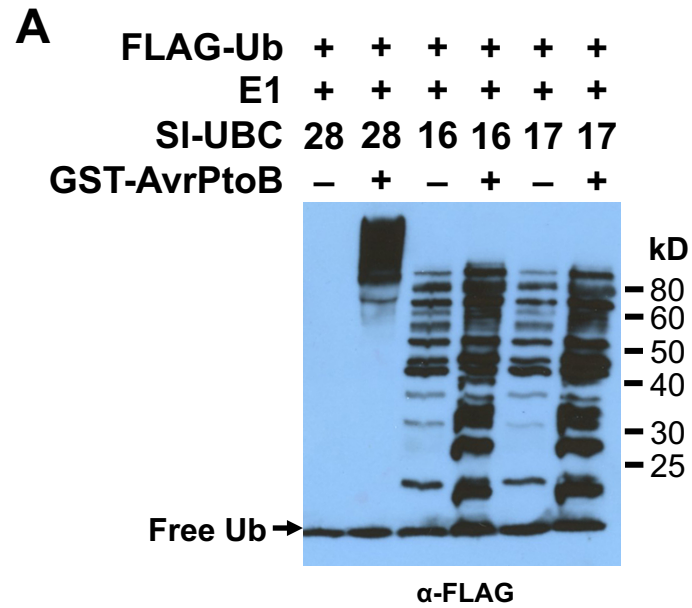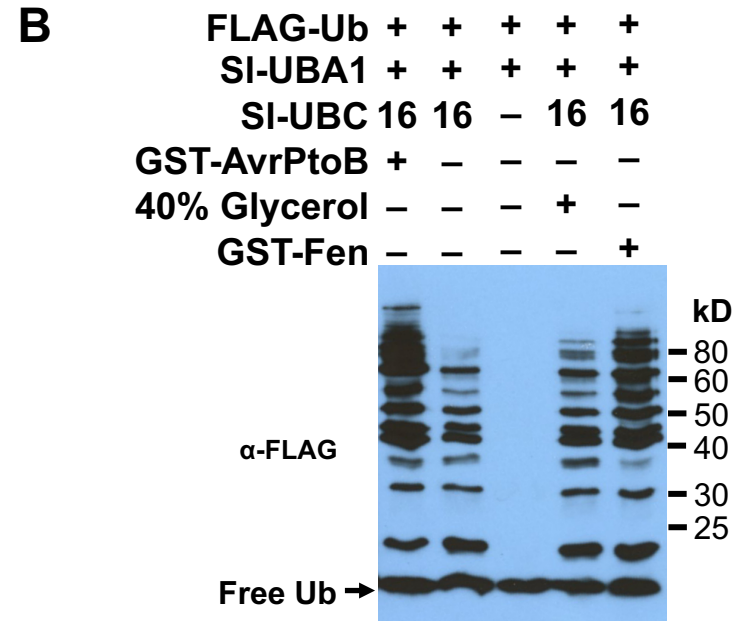

**Supplemental Figure S6. AvrPtoB shows no specificity towards the tomato ubiquitin E2 enzymes SI-UBC16, and 17.** (A) AvrPtoB shows no specificity towards the tomato E2s SI-UBC16 and 17 in *in vitro* ubiquitination assay. The E2s SI-UBC16 and 17 demonstrated auto-ubiquitin-conjugation activity in the absence of an E3 ligase (lane 3 and 5). The presence of AvrPtoB enhanced their conjugation activity but did not alter the pattern of conjugates formed (lane 4 and 6). SI-UBC28 was included as a control. The numbers on the top mark the lanes/reactions. (B) The enhancement of the conjugation activity of SI-UBC16 by AvrPtoB is non-specific. The presence of a non-E3 ligase protein, GST-Fen also enhanced the auto-ubiquitin-conjugation activity of SI-UBC16 (lane 5, as compared to lane 2), which is comparable to the effect of AvrPtoB (lane 1). In the absence of SI-UBC16, no ubiquitin conjugation was observed (lane 3). The numbers on the right denote the molecular mass of marker proteins in kD.



**Supplemental Fig. S7**

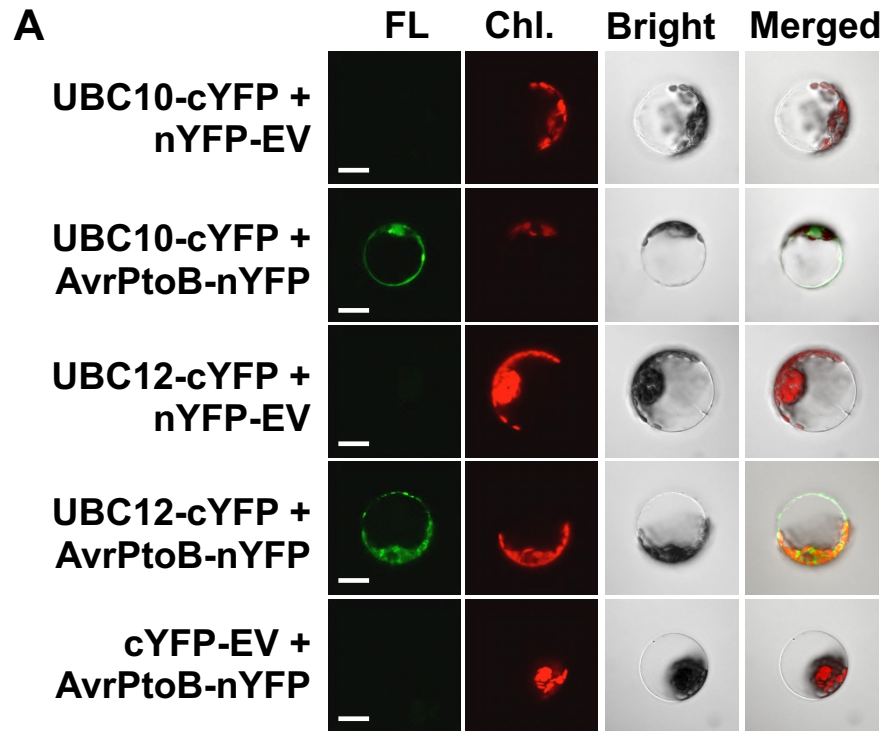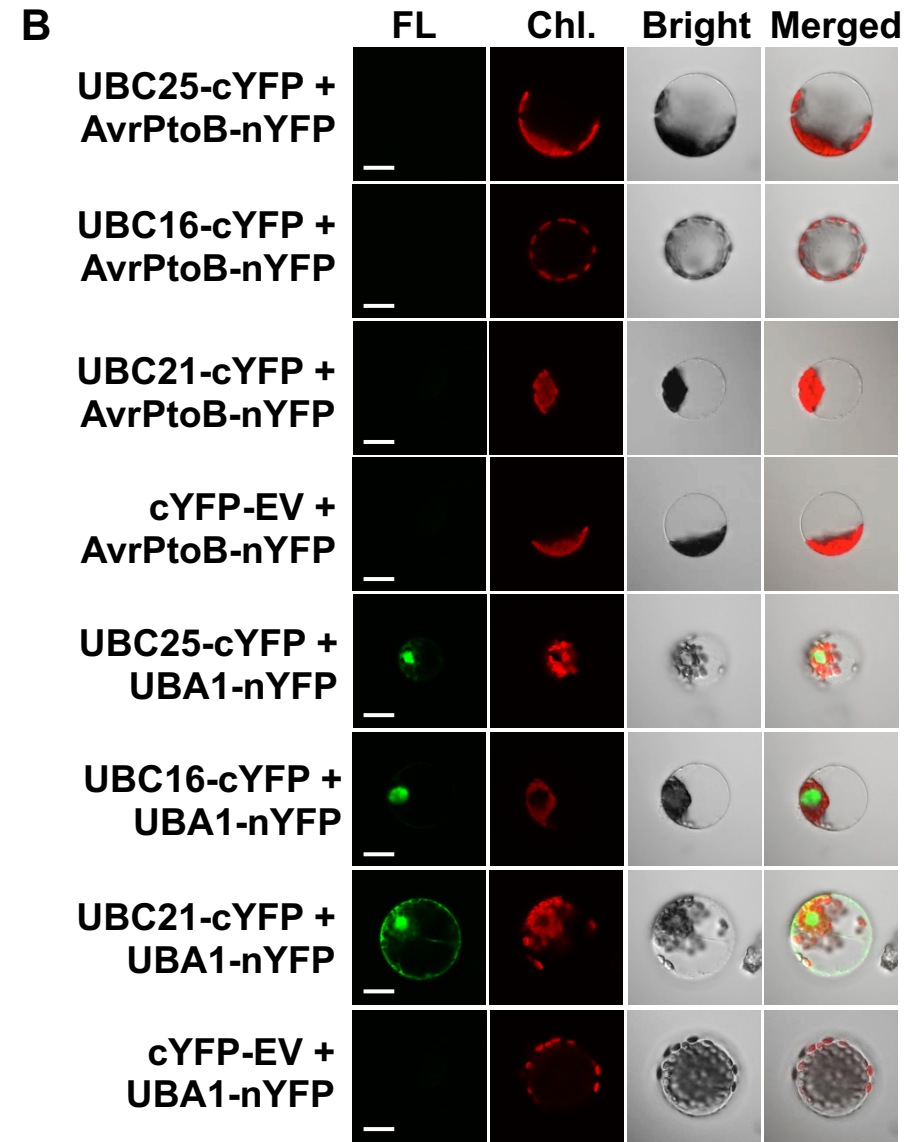

**Supplemental Figure S7. AvrPtoB interacts with tomato group III E2 members but not with E2s from other groups in BiFC assays. (A) Members of the group III E2s interact with AvrPtoB in *N. benthamiana* protoplasts. (B) Members of group VII, X, and XI tomato E2 did not interact with AvrPtoB in the BiFC assay. Tomato ubiquitin E1 enzyme UBA1 was used as positive control. Different construct pairs were transiently co-expressed in protoplasts isolated from *N. benthamiana* leaves. Cells were viewed with a confocal microscope under bright or laser light to detect cells and green fluorescence, respectively. The empty vector expressing N- and C-terminus of YFP (nYFP-EV and cYFP-EV) were used as negative control. EV, empty vector; FL, fluorescence; Chl., chlorophyll autofluorescence; Bright, bright field image. Scale bar = 20  $\mu\text{m}$ .**

**Supplemental Fig. S8**

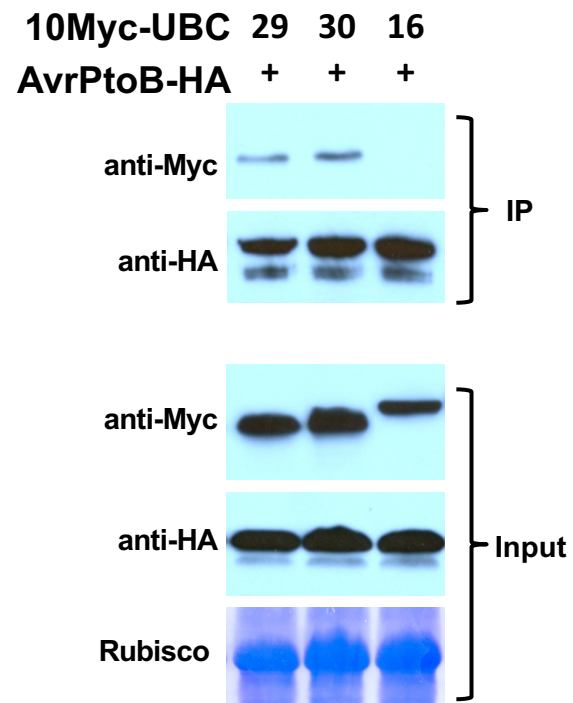

**Supplemental Figure S8. Members of Group III E2 interacted with AvrPtoB in co-immunoprecipitation (Co-IP) assay.** Group III members Ubc29 and 30 were randomly selected for the assay. AvrPtoB-HA and 10Myc-tagged E2s were transiently co-expressed in *N. benthamiana* leaves. The Co-IP was carried out with an anti-HA antibody (IP: anti-HA). The presence of corresponding proteins (Top panel) and the input (bottom panel) were detected by Western blot using anti-HA antibody for AvrPtoB-HA and anti-Myc antibody for 10Myc-tagged E2s.

## Supplemental Fig. S9

**A**

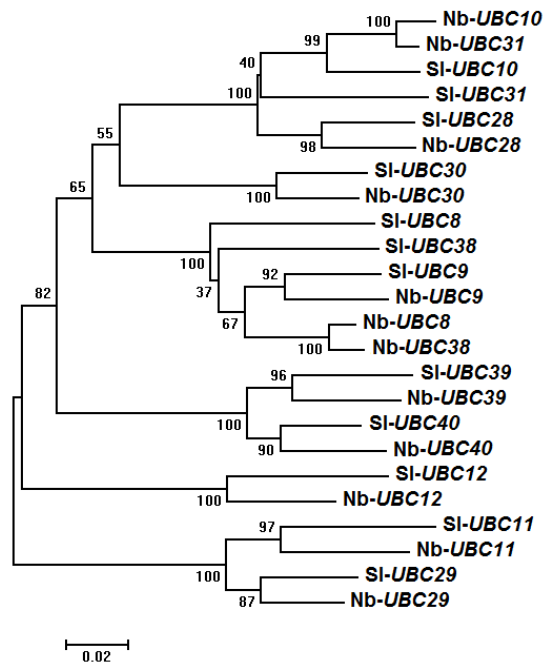

**B**

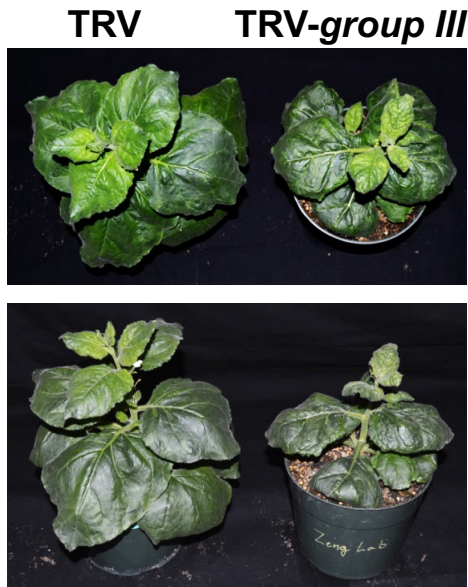

**C**

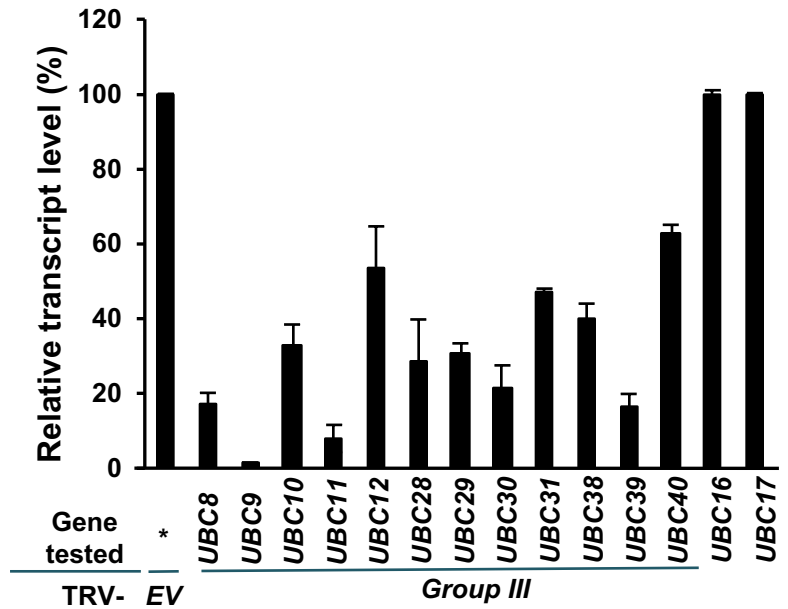

**Supplemental Figure S9. Knocking down group III E2 genes in *N. benthamiana* by Virus-Induced Gene Silencing (VIGS).** (A) The *N. benthamiana* group III E2 genes are highly homologous to their counterparts in tomato. The DNA sequences of *N. benthamiana* and tomato group III E2 genes' open reading frame (ORF) were used to generate the phylogenies. The same method and bootstrap trials as described for Figure 1 were employed for the phylogenetic analysis. The sequence IDs of the *N. benthamiana* ubiquitin E2 genes identified from the Sol Genomics Network database (SGN; <http://solgenomics.net/>) are shown in Supplemental Table I. The percentage of replicate trees in which the associated taxa clustered together in the bootstrap test (1000 replicates) is shown next to the branches. (B) Phenotypes of the *N. benthamiana* plants in which the group III E2 genes are silenced. The non-silenced TRV empty-vector (TRV) was used as a control. Photographs were taken 4 weeks after the approximately 3-week old seedlings were infiltrated with TRV or TRV-*group III* E2 genes constructs. The upper panel shows the top view of the plants while the lower panel shows the side view. (C) The group III ubiquitin E2 genes are efficiently and specifically silenced in *N. benthamiana* using the TRV vector. The transcript level of group III E2 genes and closely related E2 genes Nb-*UBC16* and *17* (outside the group III) in non-silenced TRV control (TRV) and group III ubiquitin E2 genes-silenced (TRV-*group III*) *N. benthamiana* plants was examined as described (Mural et al., 2013). Nb-*EF1 $\alpha$*  was used as an internal reference for the determination of the amount of cDNA template to be used. Experiments in (B) and (C) were repeated at least two times with similar results.



# Supplemental Fig S10

|          |                                                                                                         |     |
|----------|---------------------------------------------------------------------------------------------------------|-----|
| Nb-UBC8  | ATGGCATCCAAACGGATTCTCAAAGAGCTCAAGGATCTCCAGAAAGATCTCTCTACCTCTGCGAGCGCTGGTCCAGTTCGCTGAAGCATGTTTCATTGGC    | 100 |
| SI-UBC8  | ATGGCATCCAAACGGATTCTCAAAGAGCTCAAGGATCTCCAGAAAGATCTCTCTACCTCTGCGAGCGCTGGTCCAGTTCGCTGAAGCATGTTTCATTGGC    | 100 |
| Nb-UBC8  | AAGCAACAATATATGGGTCCGCTGACAGCCCTTATGCTGGCGGAGTGTTCCTGTTACCAATTCATTTTCCACCTGACTATCCATTAAAGCCACC          | 200 |
| SI-UBC8  | AAGCAACAATATATGGGTCCGCTGACAGCCCTTATGCTGGCGGAGTGTTCCTGTTACCAATTCATTTTCCACCTGACTATCCATTAAAGCCACC          | 200 |
| Nb-UBC8  | AGCTTTTCCAGCAAAAGGTTTCCACCCAAACATCAAAGCAATGGTAGCATTTGCCTCGACATTTGAAGGAACAATGGAGTCCGGCCTTACAAATCTCC      | 300 |
| SI-UBC8  | AGCTTTTCCAGCAAAAGGTTTCCACCCAAACATCAAAGCAATGGTAGCATTTGCCTCGACATTTGAAGGAACAATGGAGTCCGGCCTTACAAATCTCC      | 300 |
| Nb-UBC8  | AAGGTAATGCTGCTCAATCTGTTCTCTGTGACAGACCCCTAATCCGATGATCCATTGGTGCCGAGATTGCTCATATGTACAAAGACTGATAAAGCAAGT     | 400 |
| SI-UBC8  | AAGGTAATGCTGCTCAATCTGTTCTCTGTGACAGACCCCTAATCCGATGATCCATTGGTGCCGAGATTGCTCATATGTACAAAGACTGATAAAGCAAGT     | 400 |
| Nb-UBC8  | ACGAAACAACCTGCCCGGAGCTGGACTCAAAAATATGCCATGGGTAG                                                         | 447 |
| SI-UBC8  | ATGAGACAACCTGCCCGGAGCTGGACTCAAAAATATGCCATGGGTAG                                                         | 447 |
| Nb-UBC9  | ATGGCATCCAAAGAGATTCTGAAAGAGCTCAAGGATCTCCAGAAAGATCTCTCTACCTCTGCGAGCGCTGGCCAGTTCGCTGAAGATATGTTTCACTGGC    | 100 |
| SI-UBC9  | ATGGCATCCAAAGAGATTCTGAAAGAGCTCAAGGATCTCCAGAAAGATCTCTCTACCTCTGCGAGCGCTGGCCAGTTCGCTGAAGATATGTTTCACTGGC    | 100 |
| Nb-UBC9  | AAGCAACAACCTTATGGGTCCATCTGACAGCTCTTATGCTGGCGGAGTGTTCCTGTTACCAATTCATTTTCCACCTGATTATCCATTTAAGCCTCCAAAGGT  | 200 |
| SI-UBC9  | AAGCAACAACCTTATGGGTCCATCTGACAGCTCTTATGCTGGCGGAGTGTTCCTGTTACCAATTCATTTTCCACCTGATTATCCATTTAAGCCTCCAAAGGT  | 200 |
| Nb-UBC9  | AGCTTTTCCAGCAAAAGGTTTCCACCCAAACATCAAAGCAATGGTAGCATTTGCCTCGACATTTGAAGGAACAATGGAGTCCGGCCTTACAAATCTCC      | 300 |
| SI-UBC9  | AGCTTTTCCAGCAAAAGGTTTCCACCCAAACATCAAAGCAATGGTAGCATTTGCCTCGACATTTGAAGGAACAATGGAGTCCGGCCTTACAAATCTCC      | 300 |
| Nb-UBC9  | AAGGTGCTGCTGCTCAATCTGCTCTCTAACAGACCCAAATCCGATGATCCTTTGGTGCTGAGATTGCTCATATGTACAAGACTGATAAAGCAAGT         | 400 |
| SI-UBC9  | AAGGTGCTGCTGCTCAATCTGCTCTCTAACAGACCCAAATCCGATGATCCTTTGGTGCTGAGATTGCTCATATGTACAAGACTGATAAAGCAAGT         | 400 |
| Nb-UBC9  | ACGAAGCCTACTGCTCGGAGCTGGACCAAAAATATGCTATGGGTAG                                                          | 447 |
| SI-UBC9  | ACGAAGCCTACTGCTCGGAGCTGGACCAAAAATATGCTATGGGTAG                                                          | 447 |
| Nb-UBC10 | ATGGCTTCGAAACGAATATGAAGGAGCTGAAGGATCTCCAAAGATCTCTCTACCTCATGACGCGCTGGTCTGTTGGAGAGGACATGTTTCACTGGC        | 100 |
| SI-UBC10 | ATGGCTTCGAAACGAATATGAAGGAGCTGAAGGATCTCCAAAGATCTCTCTACCTCATGACGCGCTGGTCTGTTGGAGAGGACATGTTTCACTGGC        | 100 |
| Nb-UBC10 | AGGCTACAATAATGGGGCCCTCTGAGAGCCCTTACGCTGGGGTGTATTTTTAGTCACTATCCATTTTCCCTCCAGATTATCCATTCAAACCTCCTAAGGT    | 200 |
| SI-UBC10 | AGGCTACAATAATGGGGCCCTCTGAGAGCCCTTACGCTGGGGTGTATTTTTAGTCACTATCCATTTTCCCTCCAGATTATCCATTCAAACCTCCTAAGGT    | 200 |
| Nb-UBC10 | TGCTTTTAGGACAAAAGTTTTCCATCCAAATATCAATAGCAATGGGAGTATATGCTTGGACATCTGAAGGAGCAGTGGAGCCCTGCCATTAACATATTTCC   | 300 |
| SI-UBC10 | TGCTTTTAGGACAAAAGTTTTCCATCCAAATATCAATAGCAATGGGAGTATATGCTTGGACATCTGAAGGAGCAGTGGAGCCCTGCCATTAACATATTTCC   | 300 |
| Nb-UBC10 | AAGGTTTTGCTTTTCAATCTGCTCACTTTTACCGGAATCCAAACCTGATGACCCCTTGGTCTCTGAGATTGCTCACATGTACAAGACTGACAAGTCCAAAT   | 400 |
| SI-UBC10 | AAGGTTTTGCTTTTCAATCTGCTCACTTTTACCGGAATCCAAACCTGATGACCCCTTGGTCTCTGAGATTGCTCACATGTACAAGACTGACAAGTCCAAAT   | 400 |
| Nb-UBC10 | ATGAAGCAACCAGGAGTGGACCCAGAAGTACGCCATGGGTAA                                                              | 447 |
| SI-UBC10 | ATGAAGCAACCAGGAGTGGACCCAGAAGTATGCCATGGGTAA                                                              | 447 |
| Nb-UBC11 | ATGGCATCCAGGAGAAATTCAGAAAGGAACTGAAGGACTTGCAGAAAGACCCCTCTACTCTCATGAGTGCAGTCCGCTGGCAAGGATATGTTTCACTGGC    | 100 |
| SI-UBC11 | ATGGCATCCAGGAGAAATTCAGAAAGGAACTGAAGGACTTGCAGAAAGACCCCTCTACTCTCATGAGTGCAGTCCGCTGGCAAGGATATGTTTCACTGGC    | 100 |
| Nb-UBC11 | AAGCAACAACCTTATAGGTTTCCAAATGAGAGCCCTTATGCAAGTGGTGTTCCTCAAGTGGCCATCCATTCCGCTGATACCCTTTCAAACCTCCGAAGGT    | 200 |
| SI-UBC11 | AAGCAACAACCTTATAGGTTTCCAAATGAGAGCCCTTATGCAAGTGGTGTTCCTCAAGTGGCCATCCATTCCGCTGATACCCTTTCAAACCTCCGAAGGT    | 200 |
| Nb-UBC11 | GGTTTTTCCAGCAAAAGTATTTCCATCCAAATATAAATAAATGGAAATATTTGTTGGACATTTCTAAAGATCAATGGAGTCCCTGCCCTCACCATATCC     | 300 |
| SI-UBC11 | GGTTTTTCCAGCAAAAGTATTTCCATCCAAATATAAATAAATGGAAATATTTGTTGGACATTTCTAAAGATCAATGGAGTCCCTGCCCTCACCATATCC     | 300 |
| Nb-UBC11 | GAGGTTTTGCTTTCATATGTTTCACTACTAACAGATCCAAATCCAGATGATCCATGGTACCAGAAATGCTCATATGTACAAATCTGATCGGAAGAAAT      | 400 |
| SI-UBC11 | GAGGTTTTGCTTTCATATGTTTCACTACTAACAGATCCAAATCCAGATGATCCATGGTACCAGAAATGCTCATATGTACAAAGACTGATAGGTAAAGT      | 400 |
| Nb-UBC11 | ATGAATCAATGGCTCGTATTGGACCCAAAAATTTGCTATGAATTGA                                                          | 447 |
| SI-UBC11 | ATGAATCAATGGCTCGTATTGGACCCAAAAATTTGCTATGAATTGA                                                          | 447 |
| Nb-UBC12 | ATGGCTTCGAAAGAGGATTCAGAAAGGAACTGAAGGACTTGCAGAAAGACCCCTCTGCTGCTGACAGTGCAGGCTCCTGTAGGTCAGGATATGTTTCACTGGC | 100 |
| SI-UBC12 | ATGGCTTCGAAAGAGGATTCAGAAAGGAACTGAAGGACTTGCAGAAAGACCCCTCTGCTGCTGACAGTGCAGGCTCCTGTAGGTCAGGATATGTTTCACTGGC | 100 |
| Nb-UBC12 | AAGCTACATATATGGGTCCATCTGACAGCTCCGATTTTCTGGGGGTGTTTCTCTGTGCTATCCATTTCCCTCCGATTATCCATTCAGCCCCCAAGGT       | 200 |
| SI-UBC12 | AAGCTACATATATGGGTCCATCTGACAGCTCCGATTTTCTGGGGGTGTTTCTCTGTGCTATCCATTTCCCTCCGATTATCCATTCAGCCCCCAAGGT       | 200 |
| Nb-UBC12 | TTCTCTTAAACCAAGTATTTCCAATCCAAACATCAACAGTAATGGTAGTATTTGCTGATCATCTTAAAGAAACAATGGAGCCCTGCTCTTACTGTATCC     | 300 |
| SI-UBC12 | TTCTCTTAAACCAAGTATTTCCAATCCAAACATCAACAGTAATGGTAGTATTTGCTGATCATCTTAAAGAAACAATGGAGCCCTGCTCTTACTGTATCC     | 300 |
| Nb-UBC12 | AAGGTGCTGCTTTTCTATTGCTCTTTGCTTACTGATCCAAATCCAGATGATCCCTTAGTGCCAGAGATTGCTCACATGTACAAGACTGATAGAGTGAAGT    | 400 |
| SI-UBC12 | AAGGTGCTGCTTTTCTATTGCTCTTTGCTTACTGATCCAAATCCAGATGATCCCTTAGTGCCAGAGATTGCTCACATGTACAAGACTGATAGAGTGAAGT    | 400 |
| Nb-UBC12 | ATGAGAGTACTGCTAGATCTTGGACCCAGAATAATGCCATGGGTAG                                                          | 447 |
| SI-UBC12 | ATGAGAGTACTGCTAGATCTTGGACCCAGAATAATGCCATGGGTAG                                                          | 447 |
| Nb-UBC28 | ATGGCTTCGAAACGAATATGAAGGAGCTGAAGGATCTCCAAAGATCTCTCTACCTCATGACGCGCTGGTCTGTTGGAGAGGACATGTTTCACTGGC        | 100 |
| SI-UBC28 | ATGGCTTCGAAACGAATATGAAGGAGCTGAAGGATCTCCAAAGATCTCTCTACCTCATGACGCGCTGGTCTGTTGGAGAGGACATGTTTCACTGGC        | 100 |
| Nb-UBC28 | AAGCTACAATAATGGGGCCCTCCAGATAGCCCTTACAGCTGGGGGTGATTTTTAGTCACTATCCATTTTCCCTCGATTATCCATTTAAACCTCCTAAGGT    | 200 |
| SI-UBC28 | AAGCTACAATAATGGGGCCCTCCAGATAGCCCTTACAGCTGGGGGTGATTTTTAGTCACTATCCATTTTCCCTCGATTATCCATTTAAACCTCCTAAGGT    | 200 |
| Nb-UBC28 | TGCTTTTAGGACAAAAGTTTTCCATCCAAATATAAATAGCAATGGAGTATATGCTTGGACATATGAAGGAGCAATGGAGCCCTGCCCTGACTATTTCC      | 300 |
| SI-UBC28 | TGCTTTTAGGACAAAAGTTTTCCATCCAAATATAAATAGCAATGGAGTATATGCTTGGACATATGAAGGAGCAATGGAGCCCTGCCCTGACTATTTCC      | 300 |
| Nb-UBC28 | AAGGTTTTGCTTTTCAATCTGCTCACTTTTACCGGATCCAAATCCGATGATCCCTTAGTGCCGAGATTGCTCATATGTACAAGACTGACAGGGCAAAAT     | 400 |
| SI-UBC28 | AAGGTTTTGCTTTTCAATCTGCTCACTTTTACCGGATCCAAATCCGATGATCCCTTAGTGCCGAGATTGCTCATATGTACAAGACTGACAGGGCAAAAT     | 400 |
| Nb-UBC28 | ACGAAACAACCTGCCCGGAGTGGACCCAGAAGTATGCCATGGGTAA                                                          | 447 |
| SI-UBC28 | ACGAAACAACCTGCCCGGAGTGGACCCAGAAGTATGCCATGGGTAA                                                          | 447 |



Nb-UBC29 ATGGCATCCAGGAGAATTC TCAAGGAGCTAAAGGACTTGCAAAAGAGACCCTCCCACTTCATGCAGTGCAGGTCAGTCCAGTATGTT CATTGGC 100  
SI-UBC29 ATGGCATCCAGGAGAATTC AAAGGAGCTAAAGACTTGCAAAAGAGACCCTCCCACTTCATGCAGTGCAGGTCAGTCCAGTATGTT CATTGGC 100

Nb-UBC29 AAGCAACTAT AAT TGGTCCAAATGATAGCCCTTATGCTGGTGGTGT TTTTCCAAGTCACCATCCATT TCCCTCTGATTACCA TTTCAAACCTCC AAGGT 200  
SI-UBC29 AAGCAACTAT TAT TGGTCCAAATGATAGCCCTTATGCTGGTGGTGT TTTTCCAAGTCACCATCCATT TCCCTCTGATTACCA TTTCAAACCTCC AAGGT 200

Nb-UBC29 GGCTTTAGGACAAGAGTTTT CACCCAAATATAAACAATAATGGAATATTTGTTGGACATCT TAAGGATCAGTGGAGTCTGCCCTCACCATATCC 300  
SI-UBC29 GGCTTTAGGACAAGAGTTTT CATCCAAATATAAACAATAATGGAATATTTGTTGGACATCT TAAGGATCAGTGGAGTCTGCCCTCACCATATCC 300

Nb-UBC29 AAGGTTTTGCTCTCCATATGTTCTGCTGTAACAGATCCAAATCCAGATGATCCAT TGGTTCAGAGATTGCTCATATGTGCAAGACTGATA GGAACAAGT 400  
SI-UBC29 AAGGTTTTGCTCTCCATATGTTCTGCTGTAACAGATCCAAATCCAGATGATCCAT TGGTTCAGAGATTGCTCATATGTGCAAGACTGATA AACAACAAGT 400

Nb-UBC29 ATGAA TCAATGGCTCGTAGTTGGACTCAAAGTATGCT ATGAACTGA 447  
SI-UBC29 ACGAG TCAATGGCTCGTAGTTGGACTCAAAGTATGCT ATGAACTGA 447

Nb-UBC30 ATGGCTTC AAGCGGACTTTGAAGGAGCTCAAAGATCTTCAAAGGATCCTCC AACTTCTTG CAGTGTGGACCTGTTGCTGAGGACATGTTT CATTGGC 100  
SI-UBC30 ATGGCTTC AAGCGGACTTTGAAGGAGCTCAAAGATCTTCAAAGGATCCTCC AACTTCTTG CAGTGTGGACCTGTTGCTGAGGACATGTTT CATTGGC 100

Nb-UBC30 AAGCAACGATAATGGGTCTCCAGACAGTCTTT TCTG GGTGGTGT TTTTCTGGTGACGAT T CATTITTC CAGATTATCCATTCAAAGCCACTAAGGT 200  
SI-UBC30 AAGCAACGATCATGGGTCTCCAGACAGTCTTT TCTG GGTGGTGT TTTTCTGGTGACGAT T CATTITTC CAGATTATCCATTCAAAGCCACTAAGGT 200

Nb-UBC30 GGCTTTAGGACAAAAGTTTTCCACCACAAACATAAACAAGTAAACGGAGCAGATATGCTTTGACATTTTAAAGGAGCAGTGGAGCCCTGCCCTAAACATTTCC 300  
SI-UBC30 GGCTTTAGGACAAAAGTTTTCCACCACAAACATAAACAAGTAAACGGAGCAGATATGCTTTGACATTTTAAAGGAGCAGTGGAGCCCTGCCCTAAACATTTCC 300

Nb-UBC30 AAGGTTTGTCTTCAATATGTTCTCTT TGCAGGATGCTAATCTGACGATCCTTTGGTCCCGGAGATTGCACACATGTACAAGACAGACAGGAACAAGT 400  
SI-UBC30 AAGGTTTGTCTTCAATATGTTCTCTT TGCAGGATGCTAATCTGACGATCCTTTGGTCCCGGAGATTGCACACATGTACAAGACAGACAGGAACAAGT 400

Nb-UBC30 ATGAGACAACTGCAAGGAGCTGGACCCAGAAGTATGCCATGGGCTAA 447  
SI-UBC30 ACGAGACTACTGCAAGGAGCTGGACCCAGAAGTATGCCATGGGCTAA 447

Nb-UBC31 ATGGCTTCGAAACG AATATTGAAGGAGCTCAAGGATCTCAAAAAGATCCTCCACCTCA TGCAGCGCCGGT CCGTGTGGAGAGGACATGTTT CACTGGC 100  
SI-UBC31 ATGGCTTCGAAACG GATATTGAAGGAGCTCAAGGATCTCAGAAAGGATCCTCCACCTCA TGCAGCGCCGGT CCGTGTGGAGAGGACATGTTT CACTGGC 100

Nb-UBC31 AAGCTACAATATGGGTCCTCTGACAGCCCTTACGCTGGGGGTGATTTTATGCTACTATCCATTTTCTCCAGATATCCATTCAAACCTCCTAAGGT 200  
SI-UBC31 AAGCTACAATATGGGTCCTCCAGACAGTCTCTTATACGCTGGGTGATTTTATGCTACTATCCATTTTCTCCAGATATCCATTCAAACCTCCTAAGGT 200

Nb-UBC31 TGCTTTTAGGACAAAAGTTTTCCATCCAAATATCAACAGTAAATGGAGCATATGCTTGACATACTGAAGGAGCAGTGGAGCCCGCCTTAACTATTTCC 300  
SI-UBC31 TGCTTTTAGGACAAAAGTTTTCCATCCAAATATAAACAAGTAAATGGAGTATATGCTTGACATACTGAAGGAGCAGTGGAGCCCGCCTTAACTATTTCC 300

Nb-UBC31 AAGGTTTTGCTTTCAATCTGCTCACTTTTGCAGGACCCAAACCCGATGATCCCTGGTTCCTGGAGATGCTCACATGTACAAGACAGACAAGGCCAAAT 400  
SI-UBC31 AAGGTTTTGCTTTCAATCTGCTCACTTTTGCAGGACCCAAACCCGATGATCCCTGGTTCCTGGAGATGCTCACATGTACAAGACAGACAAGGCCAAAT 400

Nb-UBC31 ATGAA GCAACTGCCAGGAGTTGGACCCAGAAGTATGCCATGGGCTAA 447  
SI-UBC31 ACGAATCAACTGCCCGGTTTGGACCCAGAAGTATGCCATGGGCTAA 447

Nb-UBC38 ATGGCATCCAAACGGGATTTCAAAGAGCTCAAGATCTCAGAAAAGATCCTCTACCTCTTGACGCTGCTGGCCAGTTGGAAGCATGTTTCACTTGGC 100  
SI-UBC38 ATGGCATCCAAACGGGATTTCAAAGAGCTCAAGATCTCAGAAAAGATCCTCTACCTCTTGACGCTGCTGGCCAGTTGGAAGCATGTTTCACTTGGC 100

Nb-UBC38 AAGCAACAATATGGGTCCACC TGACAGCTCTATGCTGGGGGATGTTTCTGTTACCATTCAATTTCCACCTGATATCCATTAAAGCCACG AAGGT 200  
SI-UBC38 AAGCAACAATATGGGTCCACC TGACAGCTCTATGCTGGGGGATGTTTCTGTTACCATTCAATTTCCACCTGATATCCATTAAAGCCACG AAGGT 200

Nb-UBC38 AGCTTTAGGACAAAAGTTTTCCACCACAAACATCAACAGCAATGGTAGCATTGGCTGACATTTGAAGGACAGTGGAGCCCGCCTTTCAATCTCC 300  
SI-UBC38 TGCTTTAGGACAAAAGTTTTCCACCACAAACATCAACAGCAATGGTAGCATTGGCTGACATTTGAAGGACAGTGGAGCCCGCCTTTCAATCTCC 300

Nb-UBC38 AAGTATTECTGTCAATCTGTTCTCTGCTAACAGACCCCTAATCCTGATGATCCGTTGGTGCCGGAGATTGCTCATATGTACAAGACTGATAAAGCAAGT 400  
SI-UBC38 AAGTATTECTGTCAATCTGTTCTCTGCTAACAGACCCCTAATCCTGATGATCCGTTGGTGCCGGAGATTGCTCATATGTACAAGACTGATAAAGCAAGT 400

Nb-UBC38 ACGAAACAACCGCCGAGCTGGACTCAAAGTATGCCATGGGTTAG 447  
SI-UBC38 ACGAAACAACCGCTCGAGCTGGACTCAAAGTATGCCATGGGTTAG 447

Nb-UBC39 ATGGCGTCGAAGCGTATATTGAAAGAGCTCAAGGATTGTCAGAAGGATCCTCCGACATCATGCAGCGCTGGTCCAGTCTGCTGAGGATATGTTCCATGGC 100  
SI-UBC39 ATGGCGTCGAAGCGCATATTGAAAGAGCTCAAGGATTGTCAGAAGGATCCTCCGACATCATGCAGCGCTGGTCCAGTCTGCTGAGGATATGTTCCATGGC 100

Nb-UBC39 AAGCAACATCATGGGGCTACGATAGCCCTTATGCAAGGAGGTGATTTTTGGTTCAATCTCATTTCCTCTCTGATTATCCTTTCAAGCCTCAAAGGT 200  
SI-UBC39 AAGCAACATCATGGGGCTACGATAGCCCTTATGCAAGGAGGTGATTTTTGGTTCAATCTCATTTCCTCTCTGATTATCCTTTCAAGCCTCAAAGGT 200

Nb-UBC39 TGCATTTAGAACTAAAGTTTTCCATCCCAACATCAATAGCAATGGAAGTATATGTTAGATATCTTAAAGACAGTGGAGTCCAGCTTTGACCATATCT 300  
SI-UBC39 TGCATTTAGAACTAAAGTTTTCCATCCCAACATCAATAGCAATGGAAGTATATGTTAGATATCTTAAAGACAGTGGAGTCCAGCTTTGACCATATCT 300

Nb-UBC39 AAGGTCCTGTTGTCATCTGTTCTCTGTTGACAGATCCAAATCCAGACGATCCACTTGACCAGAAATGCTCATATGTACAAGACTGACAGGGCCAAAT 400  
SI-UBC39 AAGGTCCTGTTGTCATCTGTTCTCTGTTGACAGATCCAAATCCAGACGATCCACTTGACCAGAAATGCTCATATGTACAAGACTGACAGGGCCAAAT 400

Nb-UBC39 ACGAGGCCACTGCTCGTAGCTGGACACAGAAATATGCTATGGGATGA 447  
SI-UBC39 ACGAGGCCACTGCTCGTAGCTGGACTCAAAAATATGCTATGGGATGA 447

Nb-UBC40 ATGGCGTCGAAGGATATGAAAGGAGCTCAAGGATCTGTCAGAAGGATCCTCCACATCATGCAGTCTGGTCCAGTGGCAGAGGATATGTTCCATTGGC 100  
SI-UBC40 ATGGCGTCGAAGGATATGAAAGGAGCTCAAGGATCTGTCAGAAGGATCCTCCACATCATGCAGTCTGGTCCAGTGGCAGAGGATATGTTCCATTGGC 100

Nb-UBC40 AAGCAACAATCATGGGGCTACAGATAGCCCTTATGCGGGAGTGTATTTTTGGTTCAATCTTCCCTCCGATTATCCTTTCAAGCCTCAAAGGT 200  
SI-UBC40 AAGCAACAATCATGGGGCTACAGATAGCCCTTATGCGGGAGTGTATTTTTGGTTCAATCTTCCCTCCGATTATCCTTTCAAGCCTCAAAGGT 200

Nb-UBC40 TGCTTTAGAACTAAGTTTTCCATCCCAACATCAATAGCAATGGAAGTATGTTAGATATCTTAAAGACAGTGGAGTCCAGCTTTAACCATATCT 300  
SI-UBC40 TGCTTTAGAACTAAGTTTTCCATCCCAACATCAATAGCAATGGAAGTATGTTAGATATCTTAAAGACAGTGGAGTCCAGCTTTAACCATATCT 300

Nb-UBC40 AAGGTCCTGCTCTCCATCTGCTCTCTGTTGACAGATCCAAATCCAGACGATCCACTTGACCAGAAATGCTCATATGTACAAGACTGACAGGGCCAAAT 400  
SI-UBC40 AAGGTCCTGCTCTCCATCTGCTCTCTGTTGACAGATCCAAATCCAGACGATCCACTTGACCAGAAATGCTCATATGTACAAGACTGACAGGGCCAAAT 400

Nb-UBC40 ACGAGGCCACTGCTCGTAGCTGGACACAGAAATATGCTATGGGATGA 447  
SI-UBC40 ACGAAGCCACTGCTCGTAGCTGGACTCAGAAATATGCTATGGGATGA 447



**Supplemental Figure S10. Homologs of the group III E2 genes from *N. benthamiana* share high nucleotide sequence identity to their counterpart of tomato.** The group III E2 genes from *N. benthamiana* were searched using the BLAST algorithm (Camacho et al., 2009) against the Sol Genomics Network (SGN, <http://solgenomics.net>) database with the counterparts from tomato as the queries. The Clustal X algorithm (Larkin et al., 2007) was used for the sequence alignment. The sequences underlined red were the fragments used for building the TRV-*group III* VIGS construct. The DNA fragment from Nb-*UBC9* was designed for silencing Nb-*UBC8*, *9* and *38*; the DNA fragment from Nb-*UBC28* was designed for silencing Nb-*UBC10*, *28* and *31*; the fragment from Nb-*UBC11* for silencing Nb-*UBC11* and *29*; and the fragment from Nb-*UBC39* for silencing Nb-*UBC39* and *40*. The blue-underlined were sequences that are putatively targeted in VIGS by the red-underlined sequence of the corresponding gene from the same clade in the phylogenetic tree (Figure S6A).

Supplemental Fig. S11

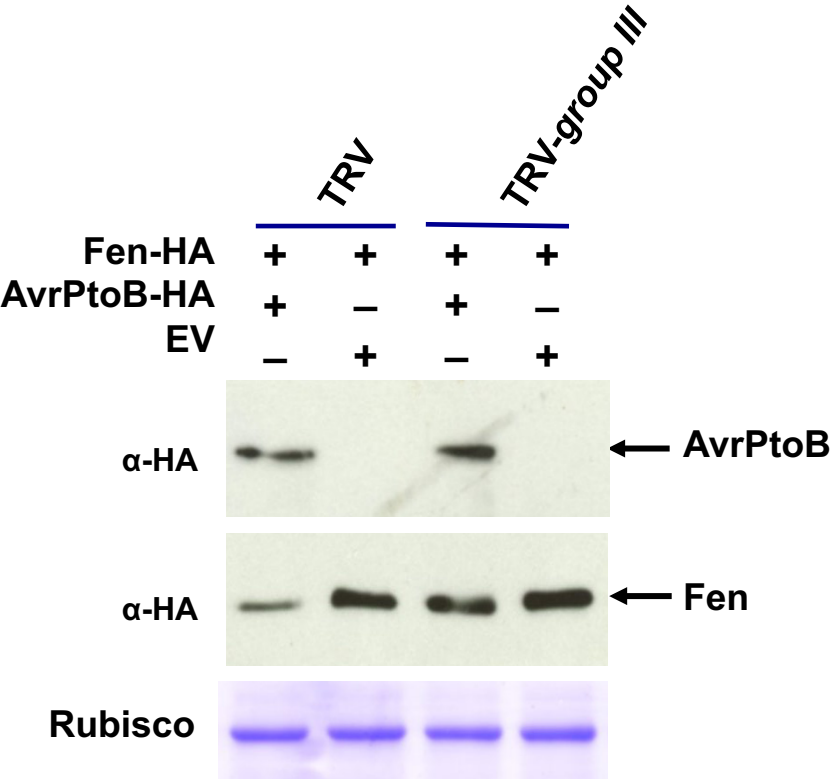

**Supplemental Figure S11. Silencing group III E2 genes diminished AvrPtoB-promoted degradation of Fen in *N. benthamiana* protoplasts.** AvrPtoB-HA and Fen-HA were transiently co-expressed in protoplasts isolated from leaves of group III E2 genes-silenced (TRV-*group III*) and non-silenced TRV control (TRV) *N. benthamiana* plants. Protoplasts were harvested and lysed at 21 h after the protoplasts were transfected with DNA carrying corresponding genes to isolate total proteins. Western blot was performed using anti-HA antibody for detecting Fen-HA and AvrPtoB-HA. Staining of ribulose 1, 5-bisphosphate carboxylase–oxygenase (Rubisco) subunits by Coomassie blue demonstrated equal loading. Marker minus (-) denotes the corresponding gene was not transfected into the protoplasts. The experiment was repeated two times with similar results.

Supplemental Fig S12

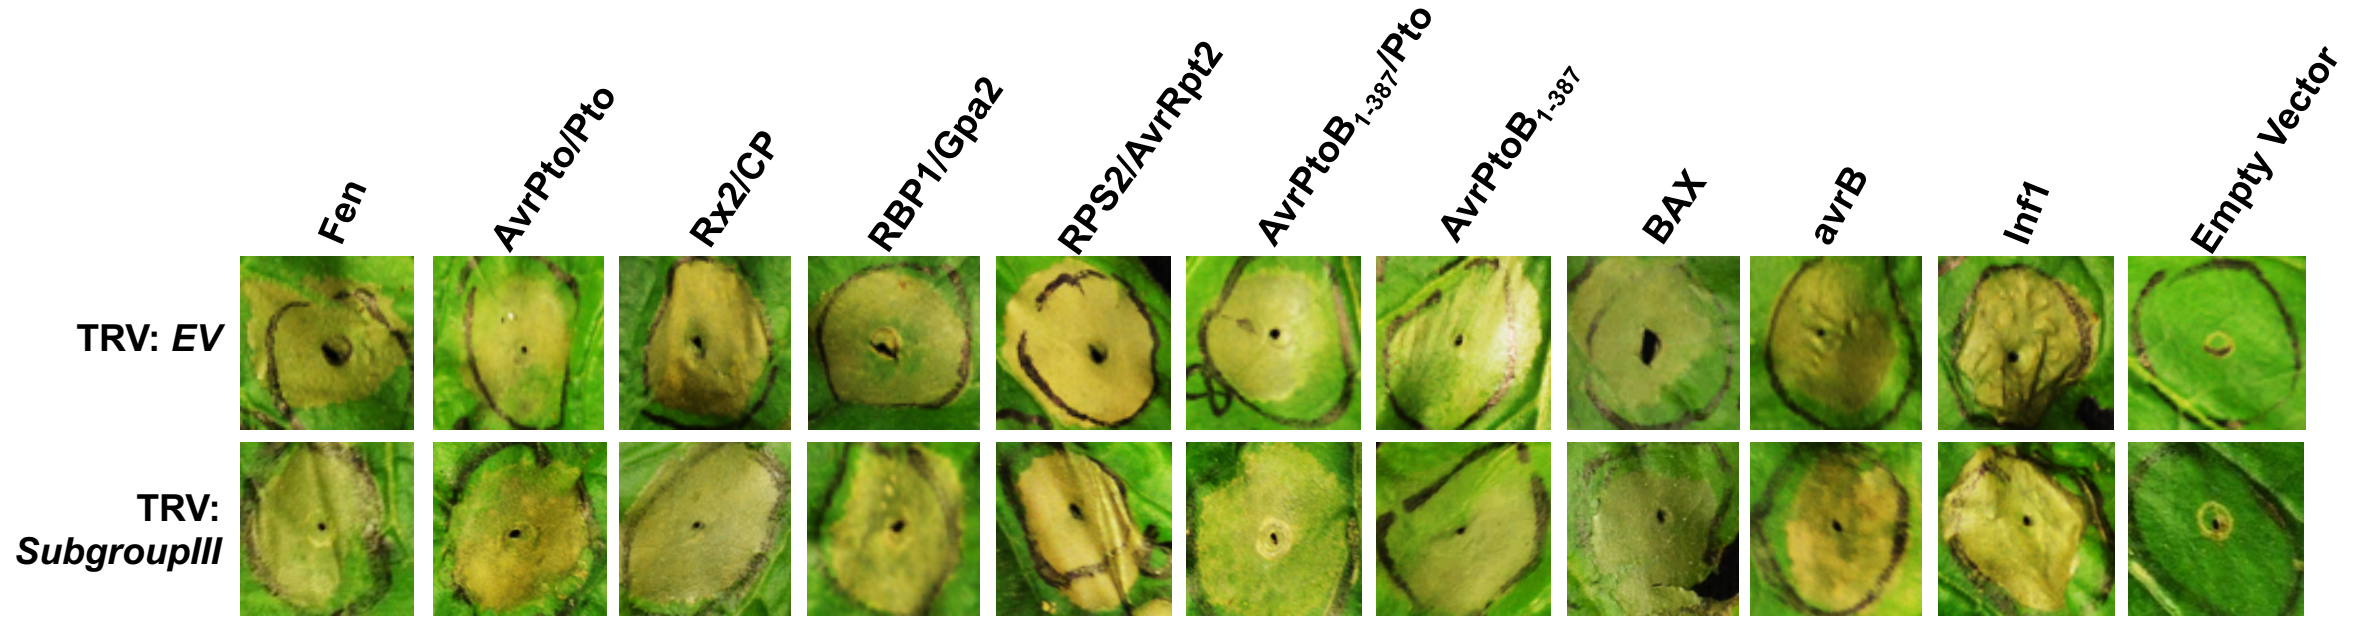

**Supplemental Figure S12. Silencing group III E2 genes does not influence multiple ETI elicitors-triggered programmed cell death (PCD).** *Agrobacterium*-mediated transient expression of Fen, AvrPto/Pto, Rx2/CP, RBP1/Gpa2, RPS2/AvrRpt2, AvrPtoB1-387/Pto, AvrPtoB1-387, BAX, avrB and Inf1 were performed in group III ubiquitin E2 genes-silenced (TRV-*group III*) and non-silenced TRV control (TRV) *N. benthamiana* plants as described (Mural et al., 2013). *Agrobacterium*-mediated transient expression of empty vector (EV) was performed as the control. At least three spots of infiltration were performed for each elicitor or EV on four different plants with typical result being shown. Photographs were taken on day four after infiltration. The experiment was repeated at least two times with similar results.

## Supplemental Fig S13

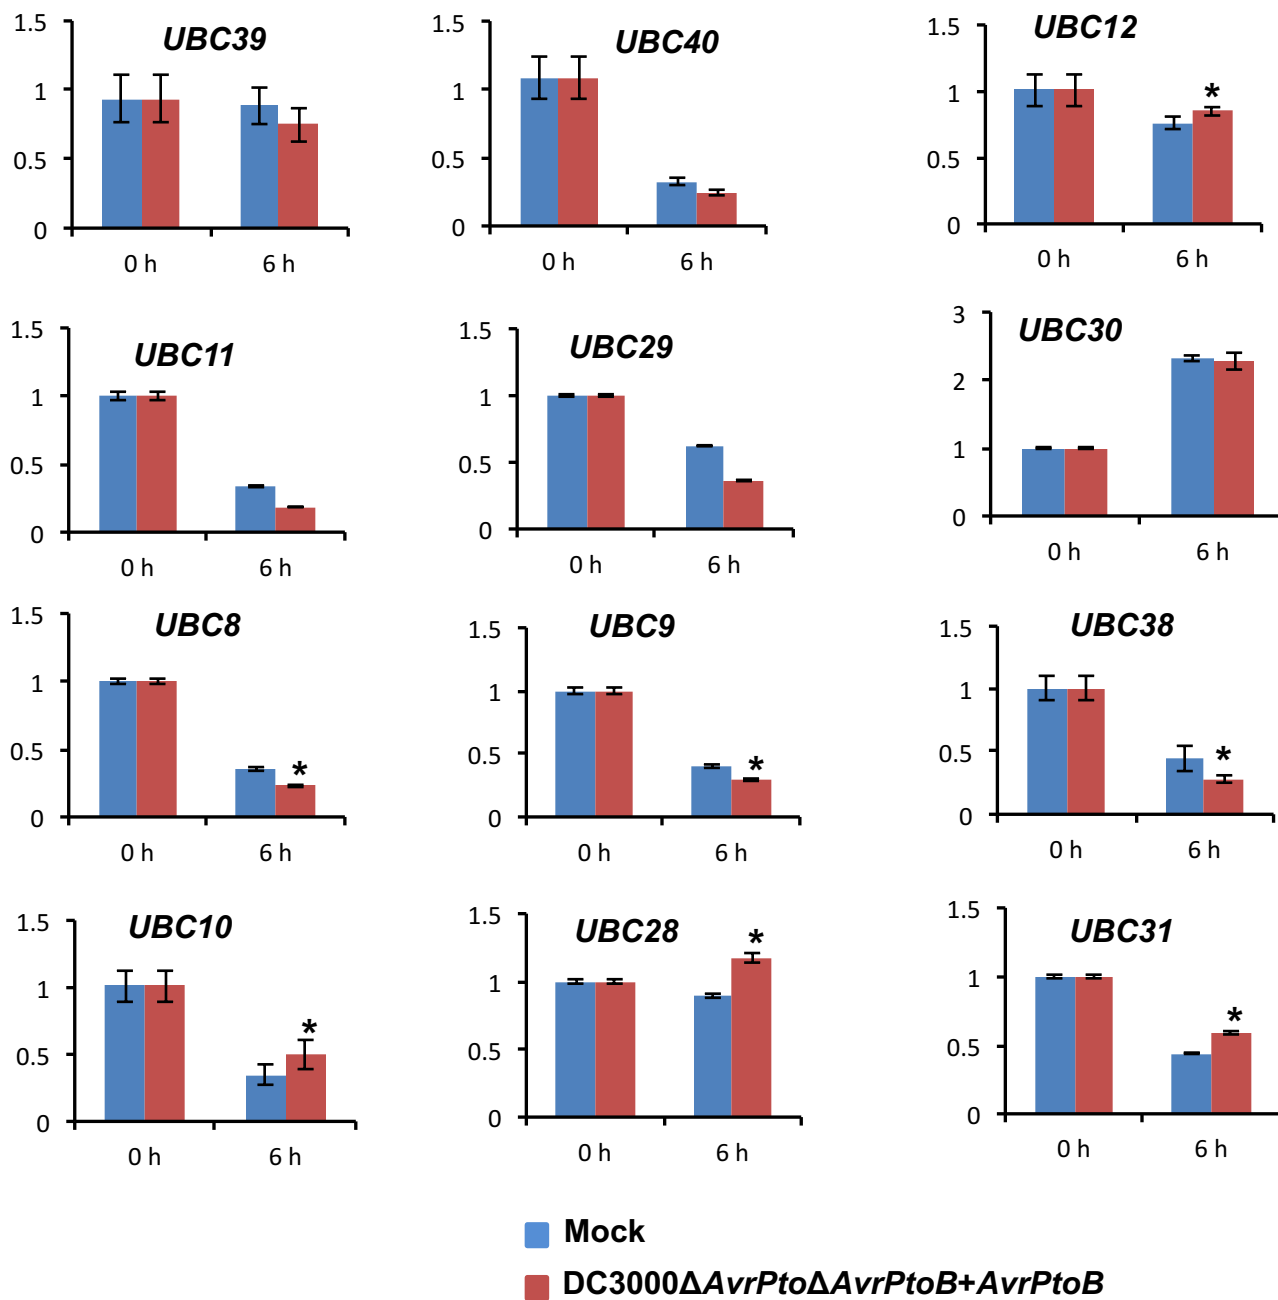

**Supplemental Figure S13. Effect of AvrPtoB on the expression of group III E2 genes.**

Real time PCR analysis of the transcript level of group III E2 genes in *Pst*- or mock-treated tomato plants. Tomato RG-pto11 plants were inoculated with *Pst* strain DC3000 $\Delta$ *avrPto* $\Delta$ *avrPtoB* expressing AvrPtoB or mock (10 mM MgCl<sub>2</sub>). Samples were collected at 0 and 6 h post inoculation. The Y-axis depicts the relative expression of the gene being tested. The experiment was performed using three technical repeats in each of the three biological replicates. Asterisks denote significant difference (P<0.05) in the expression of the E2 gene on the plants inoculated with *Pst* strain DC3000 $\Delta$ *avrPto* $\Delta$ *avrPtoB* expressing AvrPtoB compared with mock inoculation.

# Supplemental Fig S14

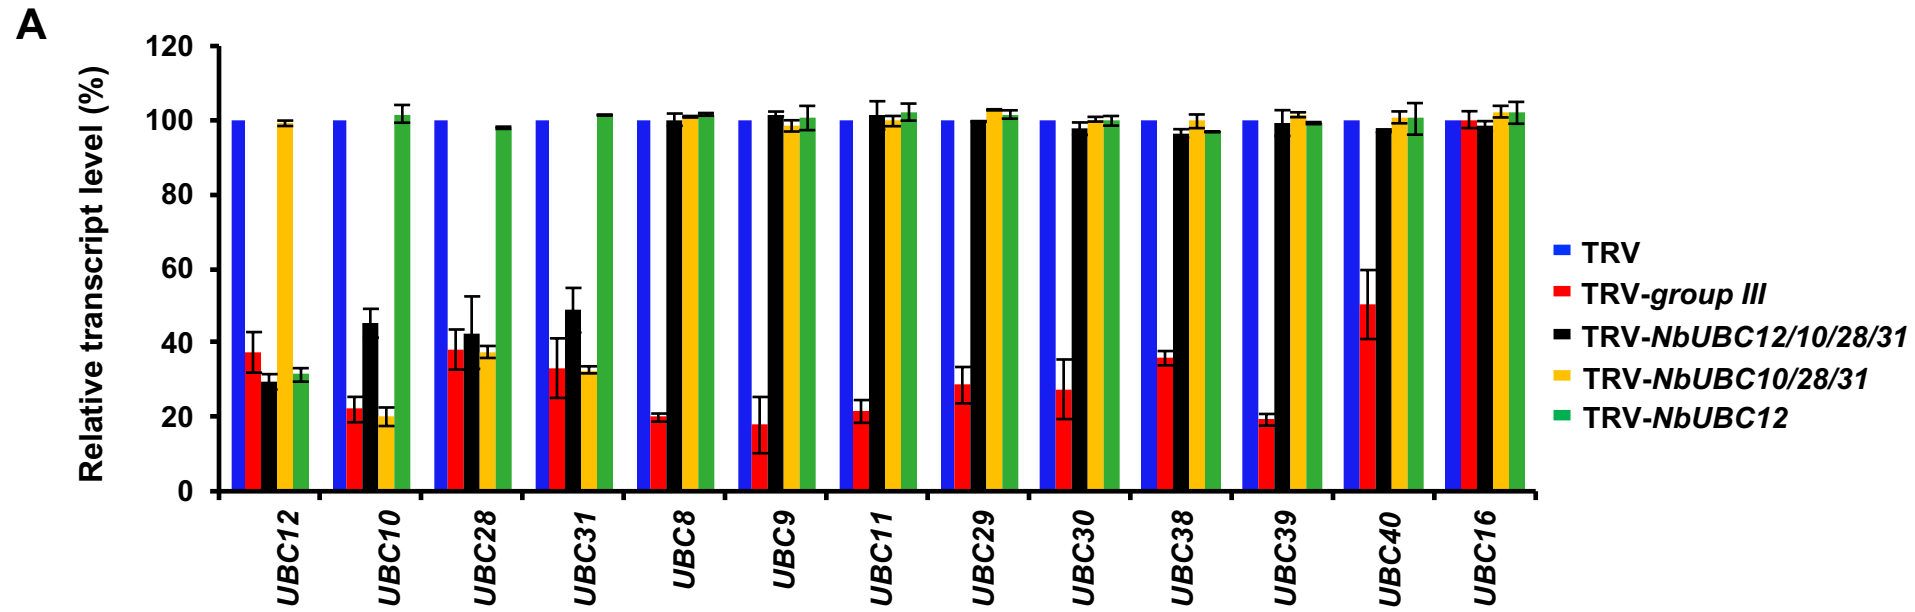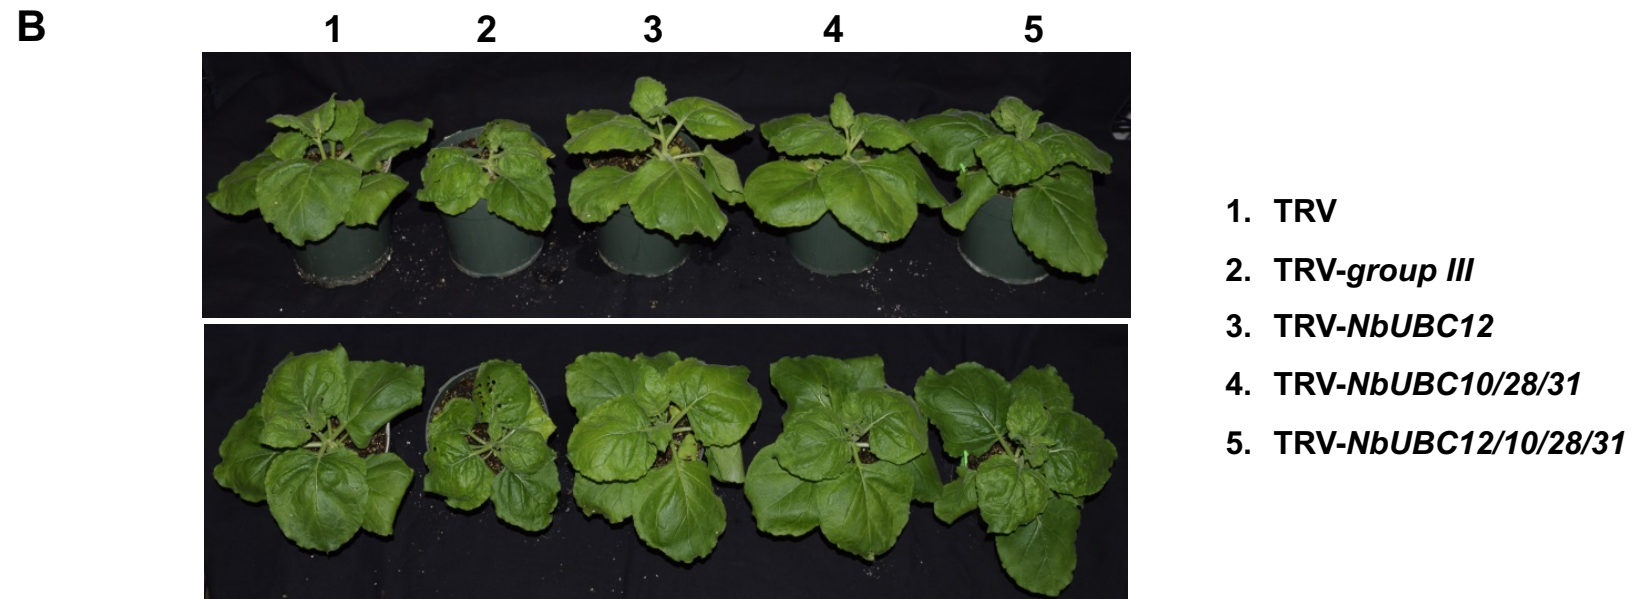



**Supplemental Figure S14. Specific silencing of E2 genes Nb-UBC12 alone, Nb-UBC10, 28 and 31 together, or Nb-UBC10, 12, 28 and 31 together in *N. benthamiana* by Virus-Induced Gene Silencing.** (A) Nb-UBC10, 12, 28 and 31 genes were specifically and efficiently silenced in *N. benthamiana* by TRV-based VIGS. The transcript level of group III E2 genes and a closely-related E2 gene outside the group III, Nb-UBC16 in various VIGS-treated *N. benthamiana* plants was examined as described (Mural et al., 2013). Nb-*EF1 $\alpha$*  was used as an internal reference for the determination of the amount of cDNA template to be used. The experiment was repeated three times with similar results. (B) Phenotypes of the *N. benthamiana* plants in which Nb-UBC12 alone, three E2 genes Nb-UBC10, 28 and 31, or Nb-UBC10, 12, 28 and 31 were specifically silenced. The non-silenced TRV-infected plant and *group III*-silenced plant were included as control. Photographs were taken 4 weeks after the ~ 3-week-old seedlings were infiltrated with TRV vector-based VIGS constructs. The upper panel shows the side view of the plants while the lower panel shows the top view.

# Supplemental Fig S15

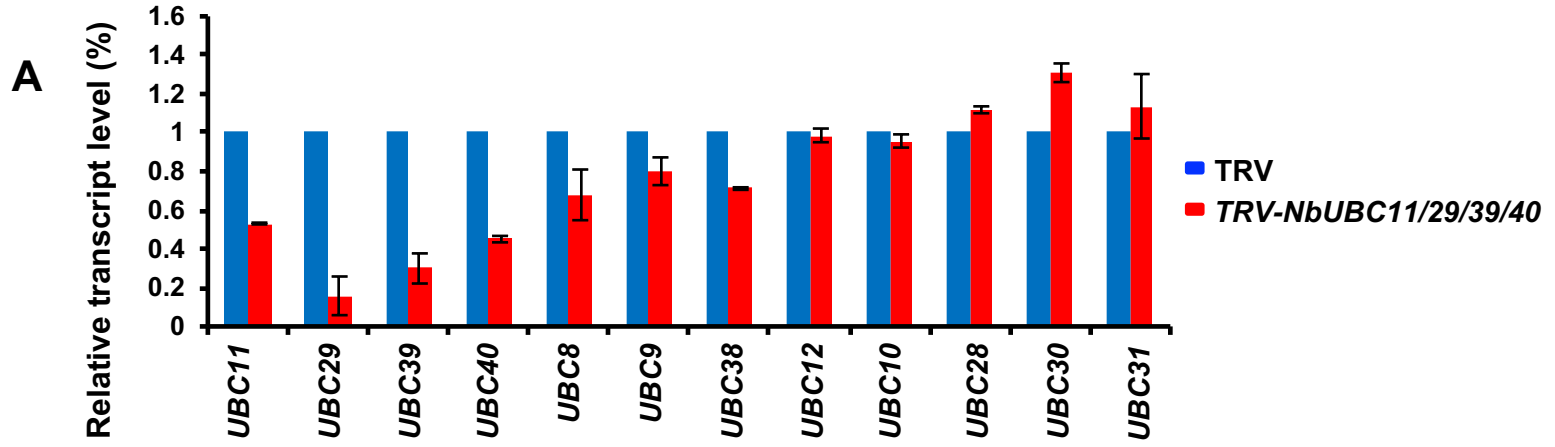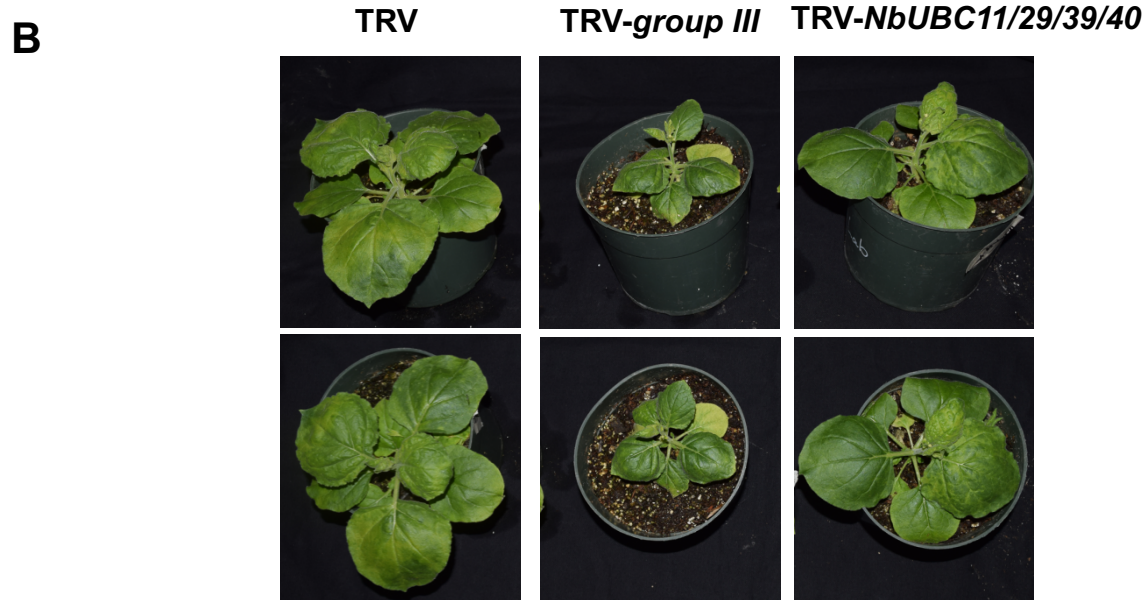

**Supplemental Figure S15. Specific silencing of E2 genes Nb-UBC11, 29, 39 and 40 together in *N. benthamiana* by Virus-Induced Gene Silencing.** (A) Nb-UBC11, 29, 39 and 40 genes were efficiently silenced in *N. benthamiana* by TRV-based VIGS. The Nb-UBC8, 9 and 38 were also very slightly knocked down in the plants. The transcript level of group III E2 genes in VIGS-treated *N. benthamiana* plants was examined as described (Mural et al., 2013). Nb-EF1 $\alpha$  was used as an internal reference for the determination of the amount of cDNA template to be used. The experiment was repeated three times with similar results. (B) Phenotypes of the *N. benthamiana* plants in which Nb-UBC11, 29, 39 and 40 were silenced. The non-silenced TRV-infected plant and *group III*-silenced plant were included as control. Photographs were taken 4 weeks after the ~ 3-week-old seedlings were infiltrated with TRV vector-based VIGS constructs. The upper panel shows the side view of the plants while the lower panel shows the top view.

# Supplemental Fig S16

**A**

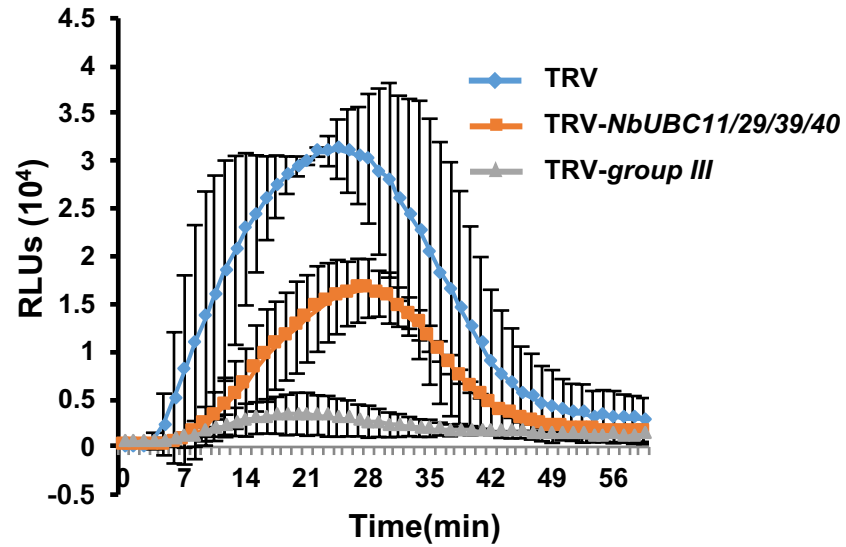

**C**

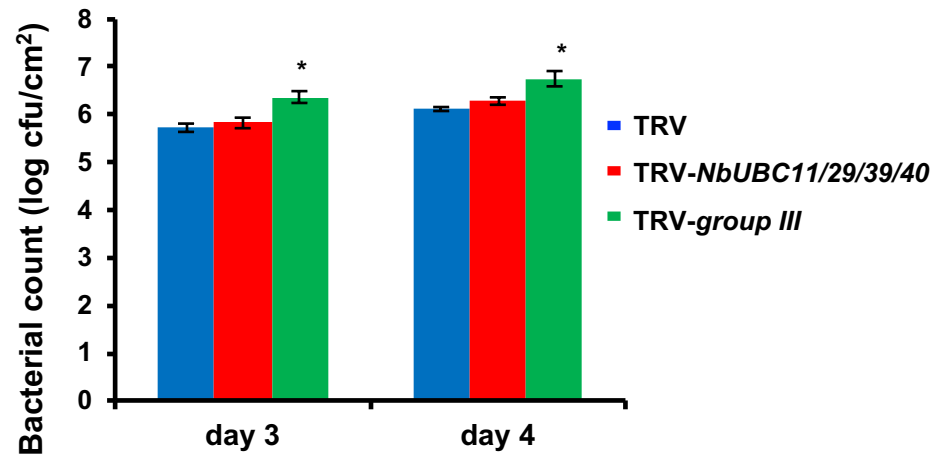

**B**

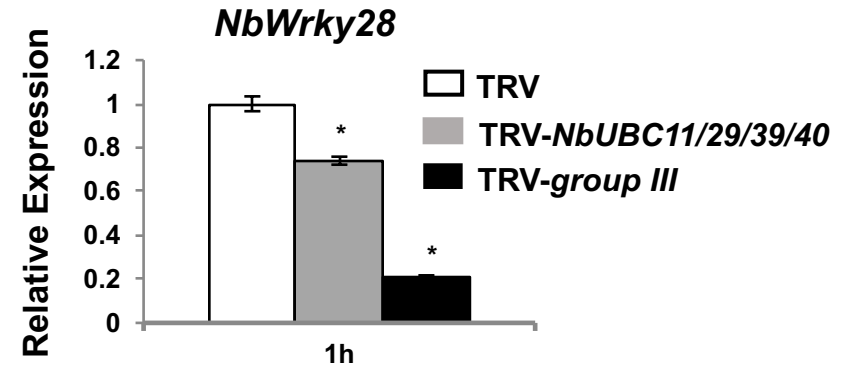

**D**

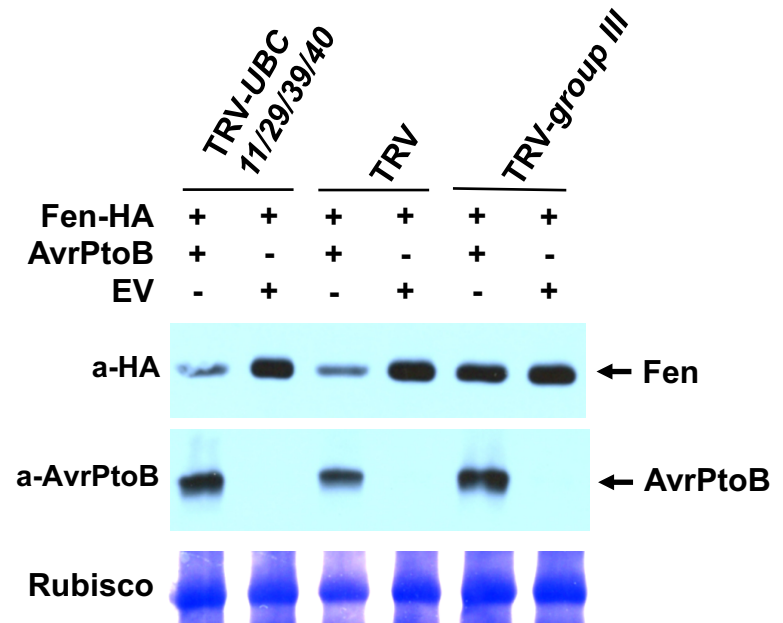

**Supplemental Figure S16. UBC11, 29, 39 and 40 of group III play a more important role in PTI.** (A) Silencing the E2 genes *UBC11*, *29*, *39* and *40* resulted in reduced ROS production induced by flg22 in a chemiluminescence assay. The diminishment of ROS on the *UBC11/29/39/40*-silenced plants was to a less extent than that on the group III-knocked down plants. (B) Knocking down the E2 genes *UBC11*, *29*, *39* and *40* down-regulates the induction of PTI reporter gene *Wrky28* by flg22. The expression of *N. benthamiana* PTI marker gene *Wrky28* was performed as described in Figure 6. The experiment was performed with three technical repeats in each of the three biological replicates. Error bars indicate standard deviation. Asterisks mark significant reduction of the expression of *Wrky28* in group III E2 genes-silenced and *UBC11/29/39/40*-silenced plants compared to non-silenced TRV control plants ( $P < 0.05$ ). (C) Bacterial populations of the *Pst* strain DC3000 $\Delta$ *hopQ1-1* on leaves of various VIGS-treated plants. Experiments were performed as described in Figure 8D and repeated three times with similar results. Asterisks indicate significantly increased bacterial growth on *group III*-silenced plants compared to the non-silenced control plants based on the one-way ANOVA ( $P < 0.01$ ). (D) No effect on the degradation of Fen caused by AvrPtoB was observed on *N. benthamiana* plants in which the expression of Nb-*UBC11*, *29*, *39* and *40* was knocked down. The experiment was performed as shown in Figure 5B and was repeated two times with similar results.

**Supplemental Table I.** List of UBC domain-containing proteins from tomato, *Arabidopsis*, *N. benthamiana*, and human.

**Supplemental Table II.** List of primers used in this study.

## REFERENCES

- Camacho, C., Coulouris, G., Avagyan, V., Ma, N., Papadopoulos, J., Bealer, K., and Madden, T.L.** (2009). BLAST+: architecture and applications. *BMC Bioinformatics* **10**, 421.
- Larkin, M.A., Blackshields, G., Brown, N.P., Chenna, R., McGettigan, P.A., McWilliam, H., Valentin, F., Wallace, I.M., Wilm, A., Lopez, R., Thompson, J.D., Gibson, T.J., and Higgins, D.G.** (2007). Clustal W and Clustal X version 2.0. *Bioinformatics* **23**, 2947-2948.
- Mural, R.V., Liu, Y., Rosebrock, T.R., Brady, J.J., Hamera, S., Connor, R.A., Martin, G.B., and Zeng, L.** (2013). The tomato Fni3 lysine-63-specific ubiquitin-conjugating enzyme and SUV ubiquitin E2 variant positively regulate plant immunity. *Plant Cell* **25**, 3615-3631.
- Zhao, Q., Tian, M., Li, Q., Cui, F., Liu, L., Yin, B., and Xie, Q.** (2013). A plant-specific in vitro ubiquitination analysis system. *Plant J* **74**, 524-533.

**Supplemental Table I List of UBC domain-containing proteins from  
tomato, Arabidopsis, *N. benthamiana*, and human**

**Arabidopsis UBCs**

| <b>NCBI Accession number of genes</b> | <b>Accession number of proteins</b> | <b>Gene locus</b> | <b>Protein name</b> |
|---------------------------------------|-------------------------------------|-------------------|---------------------|
| NM_101307.4                           | NP_563951.1                         | AT1G14400         | AtUBC1              |
| NM_126331.3                           | NP_565289.1                         | AT2G02760         | AtUBC2              |
| NM_125648.3                           | NP_568956.1                         | AT5G62540         | AtUBC3              |
| NM_123499.4                           | NP_568589.1                         | AT5G41340         | AtUBC4              |
| NM_105055.2                           | NP_564817.2                         | AT1G63800         | AtUBC5              |
| NM_130166.3                           | NP_566062.1                         | AT2G46030         | AtUBC6              |
| NM_125320.1                           | NP_568902.1                         | AT5G59300         | AtUBC7              |
| NM_180783.1                           | NP_851114.1                         | AT5G41700         | AtUBC8              |
| NM_118934.2                           | NP_567791.1                         | AT4G27960         | AtUBC9              |
| NM_124709.2                           | NP_568788.1                         | AT5G53300         | AtUBC10             |
| NM_111703.3                           | NP_566331.1                         | AT3G08690         | AtUBC11             |
| NM_111704.1                           | NP_566332.1                         | AT3G08700         | AtUBC12             |
| NM_114513.5                           | NP_566884.1                         | AT3G46460         | AtUBC13             |
| NM_115396.3                           | NP_567020.1                         | AT3G55380         | AtUBC14             |
| NM_103582.3                           | NP_564493.1                         | AT1G45050         | AtUBC15             |
| NM_106198.4                           | NP_565110.1                         | AT1G75440         | AtUBC16             |
| NM_119804.2                           | NP_568004.1                         | AT4G36410         | AtUBC17             |
| NM_123665.5                           | NP_568619.1                         | AT5G42990         | AtUBC18             |
| NM_112897.3                           | NP_566653.1                         | AT3G20060         | AtUBC19             |
| NM_103932.3                           | NP_564572.1                         | AT1G50490         | AtUBC20             |
| NM_122477.2                           | NP_568476.1                         | AT5G25760         | AtUBC21/PEX4        |
| NM_120590.2                           | NP_568148.1                         | AT5G05080         | AtUBC22             |
| NM_127245.2                           | NP_179284.1                         | AT2G16920         | AtUBC23             |
| NM_179887.2                           | NP_850218.1                         | AT2G33770         | AtUBC24/PHO2        |
| NM_112402.2                           | NP_188154.1                         | AT3G15355         | AtUBC25             |
| NM_104180.1                           | NP_175710.1                         | AT1G53020         | AtUBC26             |
| NM_124465.5                           | NP_199900.1                         | AT5G50870         | AtUBC27             |
| NM_105097.8                           | NP_564828.1                         | AT1G64230         | AtUBC28             |
| NM_127226.2                           | NP_565391.1                         | AT4G27960         | AtUBC29             |
| NM_124997.3                           | NP_568835.1                         | AT5G56150         | AtUBC30             |
| NM_103322.2                           | NP_564472.1                         | AT1G36340         | AtUBC31             |
| NM_112576.2                           | NP_566563.1                         | AT3G17000         | AtUBC32             |
| NM_124425.3                           | NP_199854                           | AT5G50430         | AtUBC33             |
| NM_001084085.1                        | NP_001077554.1                      | AT1G17280         | AtUBC34             |
| NM_106535.3                           | NP_565192.1                         | AT1G78870         | AtUBC35             |
| NM_101550.3                           | NP_564011.1                         | AT1G16890         | AtUBC36             |
| NM_113362.1                           | NP_566751.1                         | AT3G24515         | AtUBC37             |
| NM_001160817.1                        | NP_001154289.1                      | AT4G36800         | AtRCE1              |
| NM_127416.3                           | NP_565440.1                         | AT2G18600         | AtRCE2/AtUB12L      |
| NM_112075.2                           | NP_566423.1                         | AT3G12400         | AtELC               |

|             |             |           |                  |
|-------------|-------------|-----------|------------------|
| NM_121389.2 | NP_196890.1 | AT5G13860 | AtELCL(ELC-Like) |
| NM_115649.2 | NP_191346.1 | AT3G57870 | AtSCE1           |
| NM_102517.4 | NP_564289.1 | AT1G27530 | AtUfc1           |
| NM_128839.2 | NP_565754.1 | AT2G32790 | AtUBCD/E         |
| NM_112201.4 | NP_566459.2 | AT3G13550 | AtCOP10          |
| NM_180353.2 | NP_850684.1 | AT3G52560 | AtUEV1D          |
| NM_105734.3 | NP_564994.1 | AT1G70660 | AtUEV1B          |
| NM_129165.3 | NP_565834   | AT2G36060 | AtUEV1C          |
| NM_102175.3 | NP_564191   | AT1G23260 | AtUEV1A          |

## Tomato UBCs

| Chromosome loci    | Gene name  |
|--------------------|------------|
| Solyc08g081270.2.1 | SIUBC 6    |
| Solyc05g054550.2.1 | SIUBC 7    |
| Solyc12g056100.1.1 | SIUBC 8    |
| Solyc08g008220.2.1 | SIUBC 9    |
| Solyc05g050230.2.1 | SIUBC 10   |
| Solyc03g033410.2.1 | SIUBC 11   |
| Solyc07g066080.2.1 | SIUBC 12   |
| Solyc07g062570.2.1 | SIUBC 13   |
| Solyc10g007260.2.1 | SIUBC 13-2 |
| Solyc04g011430.2.1 | SIUBC 14   |
| Solyc11g071870.1.1 | SIUBC 15   |
| Solyc04g080810.2.1 | SIUBC 16   |
| Solyc02g084760.2.1 | SIUBC 17   |
| Solyc04g079970.2.1 | SIUBC 18   |
| Solyc12g089030.1.1 | SIUBC 19   |
| Solyc11g065190.1.1 | SIUBC 20   |
| Solyc11g071260.1.1 | SIUBC 21   |
| Solyc10g081160.1.1 | SIUBC 22   |
| Solyc01g111680.2.1 | SIUBC 23   |
| Solyc02g078210.2.1 | SIUBC 24   |
| Solyc10g007000.2.1 | SIUBC 25   |
| Solyc01g079290.1.1 | SIUBC 26   |
| Solyc06g072570.2.1 | SIUBC 27   |
| Solyc10g011740.2.1 | SIUBC 28   |
| Solyc02g083570.2.1 | SIUBC 29   |
| Solyc03g007470.2.1 | SIUBC 30   |
| Solyc01g095490.2.1 | SIUBC 31   |
| Solyc12g099310.1.1 | SIUBC 32   |
| Solyc03g123660.2.1 | SIUBC 33   |
| Solyc06g063100.2.1 | SIUBC 34   |
| Solyc05g054540.2.1 | SIUBC 35   |
| Solyc09g009720.1.1 | SIUBC 36   |
| Solyc07g024070.1.1 | SIUBC 37   |
| Solyc08g081950.2.1 | SIUBC 38   |



|                    |          |
|--------------------|----------|
| Solyc06g082600.2.1 | SIUBC 39 |
| Solyc06g007510.2.1 | SIUBC 40 |
| Solyc02g087750.2.1 | SIUBC 41 |
| Solyc03g112720.2.1 | SIUBC 43 |
| Solyc02g093110.2.1 | SIUBC 44 |
| Solyc04g078620.2.1 | SIUBC 45 |
| Solyc12g088680.1.1 | SIUBC 46 |
| Solyc03g044260.2.1 | SIUBC 47 |
| Solyc01g005840.2.1 | SICOP 10 |
| Solyc04g007970.2.1 | SIUEV1B  |
| Solyc01g007860.2.1 | SIUEV1C  |
| Solyc10g083120.1.1 | SIUEV1D  |

### ***N. benthamina* ubiquitin E2s**

#### **Sequence ID in sol genomics network**

| <b>(<a href="http://solgenomics.net/">http://solgenomics.net/</a>)</b>                 | <b>Gene name</b> |
|----------------------------------------------------------------------------------------|------------------|
| <a href="http://solgenomics.net/Niben101Scf05166g02005.1">Niben101Scf05166g02005.1</a> | <i>NbUBC1</i>    |
| <a href="http://solgenomics.net/Niben101Scf03194g01006.1">Niben101Scf03194g01006.1</a> | <i>NbUBC2</i>    |
| <a href="http://solgenomics.net/Niben101Scf02253g03005.1">Niben101Scf02253g03005.1</a> | <i>NbUBC3</i>    |
| <a href="http://solgenomics.net/Niben101Scf05118g08003.1">Niben101Scf05118g08003.1</a> | <i>NbUBC4</i>    |
| <a href="http://solgenomics.net/Niben101Scf07327g02015.1">Niben101Scf07327g02015.1</a> | <i>NbUBC5</i>    |
| <a href="http://solgenomics.net/Niben101Scf04988g01009.1">Niben101Scf04988g01009.1</a> | <i>NbUBC6</i>    |
| <a href="http://solgenomics.net/Niben101Scf06359g00012.1">Niben101Scf06359g00012.1</a> | <i>NbUBC7</i>    |
| <a href="http://solgenomics.net/Niben101Scf06668g00002.1">Niben101Scf06668g00002.1</a> | <i>NbUBC8</i>    |
| <a href="http://solgenomics.net/Niben101Scf12932g00011.1">Niben101Scf12932g00011.1</a> | <i>NbUBC9</i>    |
| <a href="http://solgenomics.net/Niben101Scf19214g00010.1">Niben101Scf19214g00010.1</a> | <i>NbUBC10</i>   |
| <a href="http://solgenomics.net/Niben101Scf01664g02017.1">Niben101Scf01664g02017.1</a> | <i>NbUBC11</i>   |
| <a href="http://solgenomics.net/Niben101Scf05528g01009.1">Niben101Scf05528g01009.1</a> | <i>NbUBC12</i>   |
| <a href="http://solgenomics.net/Niben101Scf01002g13002.1">Niben101Scf01002g13002.1</a> | <i>NbUBC13</i>   |
| <a href="http://solgenomics.net/Niben101Scf00398g00015.1">Niben101Scf00398g00015.1</a> | <i>NbUBC13-2</i> |
| <a href="http://solgenomics.net/Niben101Scf00449g06005.1">Niben101Scf00449g06005.1</a> | <i>NbUBC14</i>   |
| <a href="http://solgenomics.net/Niben101Scf03817g13003.1">Niben101Scf03817g13003.1</a> | <i>NbUBC15</i>   |
| <a href="http://solgenomics.net/Niben101Scf01701g12001.1">Niben101Scf01701g12001.1</a> | <i>NbUBC16</i>   |
| <a href="http://solgenomics.net/Niben101Scf05764g03007.1">Niben101Scf05764g03007.1</a> | <i>NbUBC17</i>   |
| <a href="http://solgenomics.net/Niben101Scf12320g03008.1">Niben101Scf12320g03008.1</a> | <i>NbUBC20</i>   |
| <a href="http://solgenomics.net/Niben101Scf00961g02009.1">Niben101Scf00961g02009.1</a> | <i>NbUBC21</i>   |
| <a href="http://solgenomics.net/Niben101Scf16833g00005.1">Niben101Scf16833g00005.1</a> | <i>NbUBC22</i>   |
| <a href="http://solgenomics.net/Niben101Scf01718g01006.1">Niben101Scf01718g01006.1</a> | <i>NbUBC23</i>   |
| <a href="http://solgenomics.net/Niben101Scf04899g03004.1">Niben101Scf04899g03004.1</a> | <i>NbUBC24</i>   |
| <a href="http://solgenomics.net/Niben101Scf02507g04024.1">Niben101Scf02507g04024.1</a> | <i>NbUBC25</i>   |
| <a href="http://solgenomics.net/Niben101Scf06412g04011.1">Niben101Scf06412g04011.1</a> | <i>NbUBC26</i>   |
| <a href="http://solgenomics.net/Niben101Scf03886g02005.1">Niben101Scf03886g02005.1</a> | <i>NbUBC27</i>   |
| <a href="http://solgenomics.net/Niben101Scf00470g04003.1">Niben101Scf00470g04003.1</a> | <i>NbUBC28</i>   |
| <a href="http://solgenomics.net/Niben101Scf01664g02017.1">Niben101Scf01664g02017.1</a> | <i>NbUBC29</i>   |
| <a href="http://solgenomics.net/Niben101Scf08278g00004.1">Niben101Scf08278g00004.1</a> | <i>NbUBC30</i>   |

|                                          |                |
|------------------------------------------|----------------|
| <a href="#">Niben101Scf05584g02011.1</a> | <i>NbUBC31</i> |
| <a href="#">Niben101Scf02111g11001.1</a> | <i>NbUBC32</i> |
| <a href="#">Niben101Scf00240g02004.1</a> | <i>NbUBC33</i> |
| <a href="#">Niben101Scf00870g02009.1</a> | <i>NbUBC34</i> |
| <a href="#">Niben101Scf06359g00012.1</a> | <i>NbUBC35</i> |
| <a href="#">Niben101Scf09492g00008.1</a> | <i>NbUBC36</i> |
| <a href="#">Niben101Scf00936g00004.1</a> | <i>NbUBC37</i> |
| <a href="#">Niben101Scf04673g02005.1</a> | <i>NbUBC38</i> |
| <a href="#">Niben101Scf00262g04002.1</a> | <i>NbUBC39</i> |
| <a href="#">Niben101Scf04436g07003.1</a> | <i>NbUBC40</i> |
| <a href="#">Niben101Scf01326g08022.1</a> | <i>NbUBC41</i> |

## Human ubiquitin E2s

| NCBI Accession number of proteins | Protein name   |
|-----------------------------------|----------------|
| P49459.2                          | UBE2A(hHR6A)   |
| CAG28562.1                        | UBE2B(hHR6B)   |
| CAG33269.1                        | UBE2C(UbcH10)  |
| NP_003329.1                       | UBE2D1(UbcH5A) |
| P62837.1                          | UBE2D2(UbcH5B) |
| CAG33197.1                        | UBE2D3(UbcH5C) |
| Q9Y2X8.1                          | UBE2D4(HBUCE1) |
| NP_003332.1                       | UBE2E1(UbcH6)  |
| CCQ43860.1                        | UBE2E2         |
| NP_872619.1                       | UBE2E3(UbcH9)  |
| Q5U203.2                          | UBE2F(NCE2)    |
| NP_003333.1                       | UBE2G1(UBE2G)  |
| NP_003334.2                       | UBE2G2(UBC7)   |
| NP_003335.1                       | UBE2H(UBCH)    |
| NP_919237.1                       | UBE2I(Ubc9)    |
| NP_057105.2                       | UBE2J1(NCUBE1) |
| NP_919296.1                       | UBE2J2(NCUBE2) |
| NP_005330.1                       | UBE2K(HIP2)    |
| CAG30492.1                        | UBE2L3(UbcH7)  |
| CAG33407.1                        | UBE2L6(UbcH8)  |
| NP_003960.1                       | UBE2M(Ubc12)   |
| NP_003339.1                       | UBE2N(Ubc13)   |
| NP_071349.3                       | UBE2O(E2-230K) |
| Q7Z7E8.1                          | UBE2Q1(NICE-5) |
| NP_775740.1                       | UBE2Q2         |
| P49427.2                          | UBE2R1(CDC34)  |
| Q6ZWZ2.1                          | UBE2R2(CDC34B) |
| Q16763.2                          | UBE2S(E2-EPF)  |
| Q9NPD8.1                          | UBE2T(HSPC150) |
| NP_689702.1                       | UBE2U          |
| NP_001244322.1                    | UBE2V1(UVE-1A) |

Q15819.4  
AAH10900.1  
Q9H832.2  
Q9NR09.2

UBE2V2(MMS2)  
UBE2W  
UBE2Z(Use1)  
BIRC6(apollon)

## Supplemental Table II List of primers used in this study

| Name             | Sequence(5'-3')                | purpose                                        |
|------------------|--------------------------------|------------------------------------------------|
| SI-UBC8-EcoRI-F  | ACGGATCCATGGCATCCAAGCGGATTC    | SI-UBC8 in the pGEX-4T-1 vector                |
| SI-UBC8-XhoI-R   | CGCTCGAGCTATCCCATGGCAAATTTTTC  | SI-UBC8 in the pGEX-4T-1 vector                |
| SI-UBC14-GW-F    | CACCATGGCTTACACAAGCTAGTC       | SI-UBC14 ORF gateway cloning in pDEST17 vector |
| SI-UBC14-GW-R    | TTCTCGAGCTACATTTCTTGACCGTC     | SI-UBC14 ORF gateway cloning in pDEST17 vector |
| SI-UBC31-EcoRI-F | TAGAATTCATGGCTTCGAAACGGATATT   | SI-UBC31 in the pGEX-4T-1 vector               |
| SI-UBC31-XhoI-R  | TTCTCGAGTTAACCCATTGCATATTTCTGG | SI-UBC31 in the pGEX-4T-1 vector               |
| SI-UBC39-EcoRI-F | AGGAATTCATGGCGTCGAAAGCGCATAT   | SI-UBC39 in the pGEX-4T-1 vector               |
| SI-UBC39-XhoI-R  | TGCTCGAGTTATCCCATCGCATATTTTGA  | SI-UBC39 in the pGEX-4T-1 vector               |
| SI-UBC40-EcoRI-F | TTGAATTCATGGCGTCGAAGAGGATATT   | SI-UBC40 in the pGEX-4T-1 vector               |
| SI-UBC40-XhoI-R  | AACTCGAGTCATCCCATTCATATTTCTGA  | SI-UBC40 in the pGEX-4T-1 vector               |
| SI-UBC36-F-GW    | CACCATGGCTTCTTACACAAGCCG       | SI-UBC36 ORF gateway cloning in pDEST17 vector |
| SI-UBC36-R       | CGCTCGAGTCACAACATCTCTTGATTTTC  | SI-UBC36 ORF gateway cloning in pDEST17 vector |
| SI-UBC3-EcoRI-F  | AGGAATTCATGTTCGACACCGCGGAAG    | SI-UBC3 in the pGEX-4T-1 vector                |
| SI-UBC3-XhoI-R   | CGCTCGAGTCAGCTGTGTCTGCCAGCTT   | SI-UBC3 in the pGEX-4T-1 vector                |
| SI-UBC5-EcoRI-F  | TAGGATCCATGTCTTCTCCAAGCAAACG   | SI-UBC5 in the pGEX-4T-1 vector                |
| SI-UBC5-XhoI-R   | TGCTCGAGTCATGGATCAACAGGGCCT    | SI-UBC5 in the pGEX-4T-1 vector                |
| SI-UBC6-EcoRI-F  | CAGAATTCATGTCTTCCCCTAGCAAACG   | SI-UBC6 in the pGEX-4T-1 vector                |
| SI-UBC6-XhoI-R   | TGCTCGAGTTAGGGATCTGCTTTTCCAG   | SI-UBC6 in the pGEX-4T-1 vector                |
| SI-UBC12-F-GW    | CACCATGGCTTCAAAGAGGATTCAG      | SI-UBC12 ORF gateway cloning in pDEST17 vector |
| SI-UBC12-R       | CGCTCGAGTCAACCCATTGCGTATTTCT   | SI-UBC12 ORF gateway cloning in pDEST17 vector |
| SI-UBC16-BamHI-F | GAGGATCCATGACTAGTGTCTTCTGCTTC  | SI-UBC16 in the pGEX-4T-1 vector               |
| SI-UBC16-XhoI-R  | CACTCGAGTACACTTATCGTCATGGAA    | SI-UBC16 in the pGEX-4T-1 vector               |
| SI-UBC17-BamHI-F | AAGGATCCATGTTCGGCTCCTCTGCC     | SI-UBC17 in the pGEX-4T-1 vector               |
| SI-UBC17-XhoI-R  | TGCTCGAGTCACACCTTATCATCATGGAA  | SI-UBC17 in the pGEX-4T-1 vector               |
| SI-UBC20-BamHI-F | GTGGATCCATGGCGACAATGAACAGTGG   | SI-UBC20 in the pGEX-4T-1 vector               |
| SI-UBC20-XhoI-R  | CGCTCGAGTACACACTAGGCTTGTATAG   | SI-UBC20 in the pGEX-4T-1 vector               |
| SI-UBC27-BamHI-F | GAGGATCCATGGTGGACTTGGCTAGGG    | SI-UBC27 in the pGEX-4T-1 vector               |
| SI-UBC27-XhoI-R  | CGCTCGAGTTAGCTGGACAACAGCTTTTC  | SI-UBC27 in the pGEX-4T-1 vector               |
| SI-UBC32-BamHI-F | GTGGATCCATGGCGGAAGACAAGTATAAT  | SI-UBC32 in the pGEX-4T-1 vector               |
| SI-UBC32-XhoI-R  | CGCTCGAGTTACGATTCATCCATAAAGACA | SI-UBC32 in the pGEX-4T-1 vector               |
| SI-UBC1-EcoRI-F  | CGGAATTCATGTTCGACTCCAGCT       | SI-UBC1 in the pGEX-4T-1 vector                |
| SI-UBC1-XhoI-R   | AACTCGAGTCAGTCAGCAGTCCA        | SI-UBC1 in the pGEX-4T-1 vector                |
| SI-UBC2-EcoRI-F  | CGGAATTCATGTCAACTCCTTCA        | SI-UBC2 in the pGEX-4T-1 vector                |
| SI-UBC2-XhoI-R   | AACTCGAGTCAGTCTGCAGTCCA        | SI-UBC2 in the pGEX-4T-1 vector                |
| SIUbc7-GW-F      | CACCATGGCTTCAACTTCTCCTTC       | SI-UBC7 ORF gateway cloning in pDEST15 vector  |
| SIUbc7-GW-R      | TTACATCATTTCTTGAGACCG          | SI-UBC7 ORF gateway cloning in pDEST15 vector  |
| SI-UBC15-EcoRI-F | CGGAATTCATGTCTTCTCCAAGC        | SI-UBC15 in the pGEX-4T-1 vector               |
| SI-UBC15-XhoI-R  | AACTCGAGTCAAGATCAGCATG         | SI-UBC15 in the pGEX-4T-1 vector               |
| SI-UBC21-EcoRI-F | CGGAATTCATGCAGGCTTCAAGG        | SI-UBC21 in the pGEX-4T-1 vector               |
| SI-UBC21-XhoI-R  | AACTCGAGTTAGCCCTTCTTGGG        | SI-UBC21 in the pGEX-4T-1 vector               |
| SI-UBC22-EcoRI-F | CGGAATTCATGGCAACTAATGAA        | SI-UBC22 in the pGEX-4T-1 vector               |
| SI-UBC22-XhoI-R  | CGCTCGAGTTATAATCTCTTCAA        | SI-UBC22 in the pGEX-4T-1 vector               |
| SI-UBC41-EcoRI-F | CGGAATTCATGTTCGACGCCGGCT       | SI-UBC41 in the pGEX-4T-1 vector               |
| SI-UBC41-XhoI-R  | AACTCGAGTCAGTCCGCCGTCCA        | SI-UBC41 in the pGEX-4T-1 vector               |
| SI-UBC10-ORF-F   | CACCATGGCTTCGAAACGAATATTGAA    | SI-UBC10 ORF gateway cloning in pDEST15 vector |
| SI-UBC10-ORF-R   | TTAACCATGGCATACTCTG            | SI-UBC10 ORF gateway cloning in pDEST15 vector |
| SI-UBC35-ORF-F   | CACCATGGCTTACAGCTTCTCCTTC      | SI-UBC35 ORF gateway cloning in pDEST15 vector |
| SI-UBC35-ORF-R   | TTACGTCATTTCTTGGGACCG          | SI-UBC35 ORF gateway cloning in pDEST15 vector |
| SI-UBC26-ORF-F   | CACCATGGATGAGGCAAACAAGAAC      | SI-UBC26 ORF gateway cloning in pDEST15 vector |
| SI-UBC26-ORF-R   | TTAACTAACCCCTTGGCTGTTTGA       | SI-UBC26 ORF gateway cloning in pDEST15 vector |
| SI-UBC25-ORF-F   | CACCATGGAGACTCATAAACAAGTAG     | SI-UBC25 ORF gateway cloning in pDEST15 vector |
| SI-UBC25-ORF-R   | GCTACTCAGTCCCATTCTGT           | SI-UBC25 ORF gateway cloning in pDEST15 vector |
| SI-UBC28-ORF-F   | CACCATGGCTTCTAAGCGGATATTG      | SI-UBC28 ORF gateway cloning in pDEST15 vector |
| SI-UBC28-ORF-R   | TTAACCATAGCATACTCTG            | SI-UBC28 ORF gateway cloning in pDEST15 vector |
| SI-UBC33-ORF-F   | CACCATGGCAGAAAAAGCATGTGTAA     | SI-UBC33 ORF gateway cloning in pDEST15 vector |
| SI-UBC33-ORF-R   | TCAAAGCTGAAGCAGAGGCA           | SI-UBC33 ORF gateway cloning in pDEST15 vector |
| SI-UBC13-ORF-F   | CGGAATTCATGGCTAACAGC           | SI-UBC13 in the pGEX-4T-1 vector               |
| SI-UBC13-ORF-R   | CCGCTCGAGTCATGCACCACTAG        | SI-UBC13 in the pGEX-4T-1 vector               |
| SI-UBC13-2-ORF-F | CGGAATTCATGGCTAACAGC           | SI-UBC13-2 in the pGEX-4T-1 vector             |
| SI-UBC13-2-ORF-R | CCGCTCGAGTCATGCACCACTAG        | SI-UBC13-2 in the pGEX-4T-1 vector             |
| SI-UBC4-GW-F     | CACCATGTCTTCCCCAAGCAAAG        | SI-UBC4 ORF gateway cloning in pDEST15 vector  |

|                               |                                      |                                                                                                                          |
|-------------------------------|--------------------------------------|--------------------------------------------------------------------------------------------------------------------------|
| SI-UBC4-GW-R                  | TTATGGATCAACAGGTCCTG                 | SI-UBC4 ORF gateway cloning in pDEST15 vector                                                                            |
| SI-UBC7-GW-F                  | CACCATGGCTTCAACTTCTCCTTC             | SI-UBC7 ORF gateway cloning in pDEST15 vector                                                                            |
| SI-UBC7-GW-R                  | TTACATCATTTCTTGAGACCG                | SI-UBC7 ORF gateway cloning in pDEST15 vector                                                                            |
| SI-UBC9-GW-F                  | CACCATGGCATCCAAGAGGATTCT             | SI-UBC9 ORF gateway cloning in pDEST15 vector                                                                            |
| SI-UBC9-GW-R                  | CTAACCCATTGCATACTTTTG                | SI-UBC9 ORF gateway cloning in pDEST15 vector                                                                            |
| SI-UBC11-GW-F                 | CACCATGGCATCAAGGAGAATTCAA            | SI-UBC11 ORF gateway cloning in pDEST15 vector                                                                           |
| SI-UBC11-GW-R                 | TCAATTCATAGCATATTTTTGGG              | SI-UBC11 ORF gateway cloning in pDEST15 vector                                                                           |
| SI-UBC23-GW-1F                | CACCATGGATGAGTCTGAGTCTAC             | SI-UBC23 ORF gateway cloning in pDEST15 vector                                                                           |
| SI-UBC23-GW-1R                | TCCTGCCAAGCAACATCAAC                 | SI-UBC23 ORF gateway cloning in pDEST15 vector                                                                           |
| SI-UBC23-GW-2F                | AGATCCGCAAAGTTGTGGTT                 | SI-UBC23 ORF gateway cloning in pDEST15 vector                                                                           |
| SI-UBC23-GW-2R                | GCAGCAGGTAGCCTTGGGA                  | SI-UBC23 ORF gateway cloning in pDEST15 vector                                                                           |
| SI-UBC23-GW-3F                | GATTCATGGTCCCAAAGGTC                 | SI-UBC23 ORF gateway cloning in pDEST15 vector                                                                           |
| SI-UBC23-GW23-3R              | CTACAATTGGTGGAGATGTTG                | SI-UBC23 ORF gateway cloning in pDEST15 vector                                                                           |
| SI-UBC24-GW-1F                | CACCATGGATACATCTTAAGTGAC             | SI-UBC24 ORF gateway cloning in pDEST15 vector                                                                           |
| SI-UBC24-GW-1R                | GCCAAACAATAATACCGATACA               | SI-UBC24 ORF gateway cloning in pDEST15 vector                                                                           |
| SI-UBC24-GW-2F                | CTGTTTAGGTGATGCGGTTT                 | SI-UBC24 ORF gateway cloning in pDEST15 vector                                                                           |
| SI-UBC24-GW-2R                | TTAATCGGACAACACTGACTGC               | SI-UBC24 ORF gateway cloning in pDEST15 vector                                                                           |
| SI-UBC29-GW-F                 | CACCATGGCATCCAGGAGAATTCA             | SI-UBC29 ORF gateway cloning in pDEST15 vector                                                                           |
| SI-UBC29-GW-R                 | TCAGTTCATGGCATACTTTTG                | SI-UBC29 ORF gateway cloning in pDEST15 vector                                                                           |
| SI-UBC30-GW-F                 | CACCATGGCTTCCAAGCGGATCT              | SI-UBC30 ORF gateway cloning in pDEST15 vector                                                                           |
| SI-UBC30-GW-R                 | TTAGCCCATGGCATACTTCT                 | SI-UBC30 ORF gateway cloning in pDEST15 vector                                                                           |
| SI-UBC34-GW-F                 | CACCATGGCAGAAAAGGCATGTGT             | SI-UBC34 ORF gateway cloning in pDEST15 vector                                                                           |
| SI-UBC34-GW-R                 | TCAAAGCTGAAGTAGCGGCA                 | SI-UBC34 ORF gateway cloning in pDEST15 vector                                                                           |
| SI-UBC37-GW-1F                | CACCATGGCTCAAGAGGCGCGG               | SI-UBC37 ORF gateway cloning in pDEST15 vector                                                                           |
| SI-UBC37-GW-1R                | TGAAATCGGTTGACTGAAGC                 | SI-UBC37 ORF gateway cloning in pDEST15 vector                                                                           |
| SI-UBC37-GW-2F                | CAGGCTATAAGCAATTCAGG                 | SI-UBC37 ORF gateway cloning in pDEST15 vector                                                                           |
| SI-UBC37-GW-2R                | TCAAGTATTGGATAAAAAGATTG              | SI-UBC37 ORF gateway cloning in pDEST15 vector                                                                           |
| SI-UBC38 <sup>new</sup> -GW-F | CACCATGGCGTCCAAGCGGATTCT             | SI-UBC38 ORF gateway cloning in pDEST15 vector                                                                           |
| SI-UBC38-GW-R                 | CTAACCCATGGCGTACTTTT                 | SI-UBC38 ORF gateway cloning in pDEST15 vector                                                                           |
| Nb-UBC9-GW-F                  | CACCATGGCATCCAAGAGGATTCT             | Group III VIGS fragment Nb-UBC9 cloning                                                                                  |
| Nb-UBC9-VIGS-R                | TGTAGCCTGCCAGTGAACAT                 | Group III VIGS fragment Nb-UBC9 cloning                                                                                  |
| Nb-UBC28-VIGS-F               | GAAGATATGTTTCACTGGCA                 | Group III VIGS fragment Nb-UBC28 cloning                                                                                 |
| Nb-UBC28-VIGS-R               | TATTTATATTTGGATGAAAACTTTTG           | Group III VIGS fragment Nb-UBC28 cloning                                                                                 |
| Nb-UBC11-VIGS-F               | CAAAAGTATTCCATCCAATATA               | Group III VIGS fragment Nb-UBC11 cloning                                                                                 |
| Nb-UBC11-VIGS-R               | TCGTCTGGATTTGGATCTGT                 | Group III VIGS fragment Nb-UBC11 cloning                                                                                 |
| Nb-UBC39-VIGS-F               | ACAGATCCAAACCCAGACGA                 | Group III VIGS fragment Nb-UBC39 cloning                                                                                 |
| Nb-UBC39-R                    | TGCTCGAGTTATCCCATCGCATATTTTGA        | Group III VIGS fragment Nb-UBC39 cloning                                                                                 |
| Nb-UBC12-VIGS-F               | ATGGGATAACTCGAGCATCTATCCATTTC        | Group III VIGS fragment Nb-UBC12 cloning                                                                                 |
| Nb-UBC12-VIGS-R               | TGCTGTTTATGTTGGGTGG                  | Group III VIGS fragment Nb-UBC12 cloning                                                                                 |
| Nb-UBC30-VIGS-F               | GGTTTTCCACCCAAACATAAACAGCA           | Group III VIGS fragment Nb-UBC30 cloning                                                                                 |
| Nb-UBC30-VIGS-R               | GATTAGGGTCCGTCAGAAGTG                | Group III VIGS fragment Nb-UBC30 cloning                                                                                 |
| Nb-UBC12VIGS-G-F              | CACCAGTATTTGTCTGGACATCTTAAAG         | VIGS fragment cloning for silencing Nb-UBC12 alone or the four E2 genes Nb-UBC12, 10, 28 and 31.                         |
| Nb-UBC12VIGS-G-R              | AAGCAAACCTTGGTGAGCAGCACCTTGATACAGT   | VIGS fragment cloning for silencing Nb-UBC12 alone or the four E2 genes Nb-UBC12, 10, 28 and 31.                         |
| Nb-UBC10VIGS-G-F              | CACCAAGGTTTTGCTTTCAATCTGC            | VIGS fragment cloning for silencing the three E2 genes Nb-UBC10, 28 and 31 or the four E2 genes Nb-UBC12, 10, 28 and 31. |
| Nb-UBC10VIGS-G-R              | TTATTGTAGCTTGGTGGCAATCTCAGGAACAAGGGG | VIGS fragment cloning for silencing the three E2 genes Nb-UBC10, 28 and 31 or the four E2 genes Nb-UBC12, 10, 28 and 31. |
| Nb-UBC28VIGS-G-F              | CACCAAGCTACAATAATGGGCCC              | VIGS fragment cloning for silencing the three E2 genes Nb-UBC10, 28 and 31 or the four E2 genes Nb-UBC12, 10, 28 and 31. |
| Nb-UBC28VIGS-G-R              | AATGGATAGTACTAAAAATAC                | VIGS fragment cloning for silencing the three E2 genes Nb-UBC10, 28 and 31 or the four E2 genes Nb-UBC12, 10, 28 and 31. |
| Nb-UBC11VIGS-F                | CACCGACAGCCCTTATGCAGGTGG             | VIGS fragment cloning for silencing the three E2 genes Nb-UBC11, 29, 39 and 40.                                          |
| Nb-UBC11VIGS-R                | GAATTCTCTCAGGAGGAAAATGGATGGCC        | VIGS fragment cloning for silencing the three E2 genes Nb-UBC11, 29, 39 and 40.                                          |
| Nb-UBC29VIGS-F                | TTTCTCTGAGGAGAATTCTCAAGGAGC          | VIGS fragment cloning for silencing the three E2 genes Nb-UBC11, 29, 39 and 40.                                          |
| Nb-UBC29VIGS-R                | CTACTGGACCTGCACTGCATGAAG             | VIGS fragment cloning for silencing the three E2 genes Nb-UBC11, 29, 39 and 40.                                          |

|                      |                                      |                                                                                                       |
|----------------------|--------------------------------------|-------------------------------------------------------------------------------------------------------|
| Nb-UBC39VIGS-F       | CACCTTATGCAGGAGGTGTATT               | VIGS fragment cloning for silencing the three E2 genes Nb- <i>UBC11</i> , 29, 39 and 40.              |
| Nb-UBC39VIGS-R       | TCCAGACAAAATCAGGAGGGAAATGAATTG       | VIGS fragment cloning for silencing the three E2 genes Nb- <i>UBC11</i> , 29, 39 and 40.              |
| Nb-UBC40VIGS-F       | CTCCTGATTTTGTCTGGATATTCTAAAAGAG      | VIGS fragment cloning for silencing the three E2 genes Nb- <i>UBC11</i> , 29, 39 and 40.              |
| Nb-UBC40VIGS-R       | AAGGGCTGTCGGTGGATTGGGTCAGTCAATAGGGAG | VIGS fragment cloning for silencing the three E2 genes Nb- <i>UBC11</i> , 29, 39 and 40.              |
| SI-06-ube1-1F        | CACCATGCTTCTAGAAAGAGAC               | SI- <i>UBA1</i> ORF gateway cloning in pDEST15 vector                                                 |
| SI-06-ube1-1R        | GAATGCCAAATGTAGCAGAGG                | SI- <i>UBA1</i> ORF gateway cloning in pDEST15 vector                                                 |
| SI-06-ube1-2F        | AACGAACCTTGGTCCCTATG                 | SI- <i>UBA1</i> ORF gateway cloning in pDEST15 vector                                                 |
| SI-06-ube1-2R        | CATTCACTTCGGCTGGTGT                  | SI- <i>UBA1</i> ORF gateway cloning in pDEST15 vector                                                 |
| SI-06-ube1-3F        | CCAATGTGCATTTGCATTC                  | SI- <i>UBA1</i> ORF gateway cloning in pDEST15 vector                                                 |
| SI-06-ube1-3R        | GATTACCAAGAAAATTCACGGGA              | SI- <i>UBA1</i> ORF gateway cloning in pDEST15 vector                                                 |
| SI-UBC10-XhoI-KpnI-F | GGCTCGAGGTACCATGGCTTCGAAACGAATATTG   | SI- <i>UBC10</i> ORF cloning for constructing pA7-nYFP-SI- <i>UBC10</i> and pSPYCE(M)- <i>SIUBC10</i> |
| SI-UBC10-StuI-PstI-R | GGAGGCCTGCAGACCCATGGCATACTTCTGGG     | SI- <i>UBC10</i> ORF cloning for constructing pA7-nYFP-SI- <i>UBC10</i> and pSPYCE(M)- <i>SIUBC10</i> |
| SI-UBC12-KpnI-XhoI-F | GGTACCCTCGAGATGGCTTCAAAGAGGATTCAG    | SI- <i>UBC12</i> ORF cloning for constructing pA7-nYFP-SI- <i>UBC12</i> and pSPYCE(M)- <i>SIUBC12</i> |
| SI-UBC12-PstI-R      | GGGCTGCAGACCCATTGCGTATTCTGGG         | SI- <i>UBC12</i> ORF cloning for constructing pA7-nYFP-SI- <i>UBC12</i> and pSPYCE(M)- <i>SIUBC12</i> |
| SI-UBC25-XhoI-F      | CACCTCGAGATGGAGACTCATAAACAAGTAG      | SI- <i>UBC25</i> ORF cloning for constructing pA7-nYFP-SI- <i>UBC25</i>                               |
| SI-UBC25-SmaI-R      | CCCGGGCTCAGTCCCATCTGTGTGTC           | SI- <i>UBC25</i> ORF cloning for constructing pA7-nYFP-SI- <i>UBC25</i>                               |
| SI-UBC21-XhoI-F      | CACCTCGAGATGCAGGCTTCAAGGGCAAGAC      | SI- <i>UBC21</i> ORF cloning for constructing pA7-nYFP-SI- <i>UBC21</i>                               |
| SI-UBC21-SmaI-R      | CCCGGGGCCCTTCTTGGGCATTGC             | SI- <i>UBC21</i> ORF cloning for constructing pA7-nYFP-SI- <i>UBC21</i>                               |
| SI-UBC16-XhoI-F      | CACCTCGAGATGACTAGTGCTTCTGCTTCATC     | SI- <i>UBC16</i> ORF cloning for constructing pA7-nYFP-SI- <i>UBC16</i> and pSPYCE(M)- <i>SIUBC16</i> |
| SI-UBC16-SmaI-R      | CCCGGGCACTTTATCGTCATGGAACC           | SI- <i>UBC16</i> ORF cloning for constructing pA7-nYFP-SI- <i>UBC16</i> and pSPYCE(M)- <i>SIUBC16</i> |
| SI-UBA1-XhoI-F       | CACCTCGAGATGCTTCTAGAAAGAGACCGG       | SI- <i>UBA1</i> ORF cloning for constructing pA7-cYFP-SI- <i>UBA1</i>                                 |
| SI-UBA1-SmaI-R       | CCCGGGACGGAAGTATACAGACACCAG          | SI- <i>UBA1</i> ORF cloning for constructing pA7-cYFP-SI- <i>UBA1</i>                                 |
| AvrptoB-XhoI-KpnI-F  | GGCTCGAGGTACCATGGCGGTATCAATAGAGC     | <i>AvrPtoB</i> ORF cloning for constructing pA7-cYFP- <i>AvrPtoB</i> and pBTEX-nYFP- <i>AvrPtoB</i>   |
| AvrptoB-StuI-PstI-R  | GGAGGCCTGCAGGGGACTATTCTAAAAGCAT      | <i>AvrPtoB</i> ORF cloning for constructing pA7-cYFP- <i>AvrPtoB</i> and pBTEX-nYFP- <i>AvrPtoB</i>   |
| Nb-EF1a-F            | AGCCTGGTATGGTTGTGACTTTTTG            | RT-PCR for reference gene Nb- <i>EF1a</i>                                                             |
| Nb-EF1a-R            | CATGGGCTTGGTGGGAATC                  | RT-PCR for reference gene Nb- <i>EF1a</i>                                                             |
| Nb-UBC8-RT-F         | CACCATGGCATCCAACCGATTCTCAAAG         | RT-PCR for Nb- <i>UBC8</i>                                                                            |
| Nb-UBC8-RT-R         | AGCCCCTCCAGAGATGGTCACT               | RT-PCR for Nb- <i>UBC8</i>                                                                            |
| Nb-UBC9-RT-F         | CACCATGGCATCCAAGAGAATTCTGAAAAG       | RT-PCR for Nb- <i>UBC9</i>                                                                            |
| Nb-UBC9-RT-R         | CCAAATATTTGTGTTTCAGCAACTAACCC        | RT-PCR for Nb- <i>UBC9</i>                                                                            |
| Nb-UBC10-RT-F        | CACCATGGCTTCGAAACGAATATTGAA          | RT-PCR for Nb- <i>UBC10</i>                                                                           |
| Nb-UBC10-RT-R        | CCGCCATAGGCAATATTAGCCCA              | RT-PCR for Nb- <i>UBC10</i>                                                                           |
| Nb-UBC11-RT-F        | CACCATGGCATCCAGGAGAATTCA             | RT-PCR for Nb- <i>UBC11</i>                                                                           |
| Nb-UBC11-RT-R        | CAACTCAATTCATAGCAAACCTTTTGG          | RT-PCR for Nb- <i>UBC11</i>                                                                           |
| Nb-UBC12-RT-F        | TCTTACTGTATCCAAGGTGCTGCT             | RT-PCR for Nb- <i>UBC12</i>                                                                           |
| Nb-UBC12-RT-R        | CCAAATGTTTTTCATCCCATGGCATAT          | RT-PCR for Nb- <i>UBC12</i>                                                                           |
| Nb-UBC28-RT-F        | TAGAATTCATGGCTTCGAAACGGATATT         | RT-PCR for Nb- <i>UBC28</i>                                                                           |
| Nb-UBC28-RT-R        | CATGGGTTAAACCGTTACCTATGG             | RT-PCR for Nb- <i>UBC28</i>                                                                           |
| Nb-UBC29-RT-F        | CACCATGGCATCCAGGAGAATTCA             | RT-PCR for Nb- <i>UBC29</i>                                                                           |
| Nb-UBC29-RT-R        | CTTCATGTCTTCAGACTCAGTTCATA           | RT-PCR for Nb- <i>UBC29</i>                                                                           |
| Nb-UBC30-RT-F        | CACCATGGCTTCCAAGCGGATCT              | RT-PCR for Nb- <i>UBC30</i>                                                                           |
| Nb-UBC30-RT-R        | TTAGCCCATGGCATACTTCT                 | RT-PCR for Nb- <i>UBC30</i>                                                                           |
| Nb-UBC31-RT-F        | CACCATGGCTTCGAAACGAATATTGAA          | RT-PCR for Nb- <i>UBC31</i>                                                                           |
| Nb-UBC31-RT-R        | GCCGCCATAGGCAATAGTTAGCCC             | RT-PCR for Nb- <i>UBC31</i>                                                                           |
| Nb-UBC38-RT-F        | ACGGATCCATGGCATCCAAGCGGATTC          | RT-PCR for Nb- <i>UBC38</i>                                                                           |
| Nb-UBC38-RT-R        | CTAACCCATGGCGTACTTTT                 | RT-PCR for Nb- <i>UBC38</i>                                                                           |
| Nb-UBC39-RT-F        | AGGAATTCATGGCGTCAAGCGCATAT           | RT-PCR for Nb- <i>UBC39</i>                                                                           |
| Nb-UBC39-RT-R        | GGACACTTTCCGCATCATCCCATATA           | RT-PCR for Nb- <i>UBC39</i>                                                                           |
| Nb-UBC40-RT-F        | TTGAATTCATGGCGTCAAGAGGATATT          | RT-PCR for Nb- <i>UBC40</i>                                                                           |
| Nb-UBC40-RT-R        | TCATTACCACAAGCACAATAAGA              | RT-PCR for Nb- <i>UBC40</i>                                                                           |
| Nb-UBC16-RT-F        | GGGCACCAGGAACCTCTGTAT                | RT-PCR for Nb- <i>UBC16</i>                                                                           |

|                   |                                     |                                                                               |
|-------------------|-------------------------------------|-------------------------------------------------------------------------------|
| Nb-UBC16-RT-R     | TGGTATGGGAGTTGGAGTCA                | RT-PCR for Nb- <i>UBC16</i>                                                   |
| Nb-UBC17-RT-F     | TGGGTGATTGAAGTGATTGGG               | RT-PCR for Nb- <i>UBC17</i>                                                   |
| Nb-UBC17-RT-R     | TCAAGGGTCAGAAGGACACC                | RT-PCR for Nb- <i>UBC17</i>                                                   |
| SI-EF1a-RT-F      | TCCAAAGATGGTCAGACCCGTGAA            | Real-time PCR for reference gene SI- <i>EF1a</i>                              |
| SI-EF1a-RT-R      | ATACCTAGCCTTGGAGTACTTGGG            | Real-time PCR for reference gene SI- <i>EF1a</i>                              |
| SI-UBC8-RT-F      | CATTTTGAAGGAACAGTGGAGC              | Real-time PCR for SI- <i>UBC8</i>                                             |
| SI-UBC8-RT-R      | CTCCGGGCAGTTGTCTCATA                | Real-time PCR for SI- <i>UBC8</i>                                             |
| SI-UBC9-RT-F      | TTCCAAGGTGCTGTGTCAATC               | Real-time PCR for SI- <i>UBC9</i>                                             |
| SI-UBC9-RT-R      | ATGGGTCTGAGCAGCAACTAAC              | Real-time PCR for SI- <i>UBC9</i>                                             |
| SI-UBC10-RT-F     | TGCTGGGGTGTTTTTTTGGTC               | Real-time PCR for SI- <i>UBC10</i>                                            |
| SI-UBC10-RT-R     | AAGGGGTCGTCAGGGTTTGGGT              | Real-time PCR for SI- <i>UBC10</i>                                            |
| SI-UBC11-RT-F     | AGGTCCTGTGGCTCAGGATATA              | Real-time PCR for SI- <i>UBC11</i>                                            |
| SI-UBC11-RT-R     | CTTAGGGGTTTGAAGGGTAG                | Real-time PCR for SI- <i>UBC11</i>                                            |
| SI-UBC12-RT-F     | TCTTACTGTATCCAAGGTGCTGCT            | Real-time PCR for SI- <i>UBC12</i>                                            |
| SI-UBC12-RT-R     | GTGTTCAACCCATTGCGTATTCT             | Real-time PCR for SI- <i>UBC12</i>                                            |
| SI-UBC28-RT-F     | TACAAGACAGACAGGGCAAATA              | Real-time PCR for SI- <i>UBC28</i>                                            |
| SI-UBC28-RT-R     | GGGAAGGTAGAGGACAGAGAGAC             | Real-time PCR for SI- <i>UBC28</i>                                            |
| SI-UBC29-RT-F     | CATGCAGTGCAGGTCCAGTAGC              | Real-time PCR for SI- <i>UBC29</i>                                            |
| SI-UBC29-RT-R     | CTTGGGAGGTTTGAAGGGTAA               | Real-time PCR for SI- <i>UBC29</i>                                            |
| SI-UBC30-RT-F     | AGTCCTTATTCCGGTGGAGTTT              | Real-time PCR for SI- <i>UBC30</i>                                            |
| SI-UBC30-RT-R     | CTTCCGTTGCTGTTTATGTTTG              | Real-time PCR for SI- <i>UBC30</i>                                            |
| SI-UBC31-RT-F     | AGGTTTTGCTTTCAATTGCTC               | Real-time PCR for SI- <i>UBC31</i>                                            |
| SI-UBC31-RT-R     | GGCAGTTGATTTCGTATTGGC               | Real-time PCR for SI- <i>UBC31</i>                                            |
| SI-UBC38-RT-F     | TCCTACTTCTGCAGTGTGGT                | Real-time PCR for SI- <i>UBC38</i>                                            |
| SI-UBC38-RT-R     | CATTGCTGTTGATGTTCCGGTG              | Real-time PCR for SI- <i>UBC38</i>                                            |
| SI-UBC39-RT-F     | TTCCCCCTGATTATCCCTTC                | Real-time PCR for SI- <i>UBC39</i>                                            |
| SI-UBC39-RT-R     | GTGGTCTCGTATTGGCCCTGT               | Real-time PCR for SI- <i>UBC39</i>                                            |
| SI-UBC40-RT-F     | CCCTTATGCTGGAGGTGTATT               | Real-time PCR for SI- <i>UBC40</i>                                            |
| SI-UBC40-RT-R     | ATCATCTGGGTTTGGGTCTGT               | Real-time PCR for SI- <i>UBC40</i>                                            |
| Nb-EF1a-F         | TACTGGTGGTTTTGAAGCTG                | Real-time PCR for reference gene Nb- <i>EF1a</i>                              |
| Nb-EF1a-R         | ATACCTAGCCTTGGAGTACTTGGG            | Real-time PCR for reference gene Nb- <i>EF1a</i>                              |
| Nb-Wrky28-F       | GCATTCATGACAAAGAGTGAGGTT            | Real-time PCR for Nb- <i>Wrky28</i>                                           |
| Nb-Wrky28-R       | GACATTTTTGACTTGTGCACCTAT            | Real-time PCR for Nb- <i>Wrky28</i>                                           |
| Nb-Pti5-F         | CCTCCAAGTTTGAGCTCAGATAGT            | Real-time PCR for Nb- <i>Pti5</i>                                             |
| Nb-Pti5-R         | CCAAGAAATTCTCCATGTA                 | Real-time PCR for Nb- <i>Pti5</i>                                             |
| Nb-Acre31-F       | GAGAAACTGGGATTGCCTGAAGGA            | Real-time PCR for Nb- <i>Acre31</i>                                           |
| Nb-Acre31-R       | AACTTGGCCATCGTGATCTTGGTC            | Real-time PCR for Nb- <i>Acre31</i>                                           |
| Nb-Gras2-F        | TCATGAGGCGTTACTCGGAGCATT            | Real-time PCR for Nb- <i>Gras2</i>                                            |
| Nb-Gras2-R        | TACCTAGCACCAAGCAGATGCAGA            | Real-time PCR for Nb- <i>Gras2</i>                                            |
| AvrPtoB307-smaI-R | CCCGGGTACATGTCTTTCAAGGGCCGTG        | <i>AvrPtoB</i> ORF cloning for constructing pSPYNE173-<br><i>AvrPtoB1-307</i> |
| SI-UBC8-XhoI-F    | CACCCTCGAGATGGCATCCAAGCGGATTCTC     | SI- <i>UBC8</i> ORF cloning for constructing pSPYCE(M)- <i>SIUBC8</i>         |
| SI-UBC8-SmaI-R    | CCCGGGTCCCATGGCAAATTTTGGAGTC        | SI- <i>UBC8</i> ORF cloning for constructing pSPYCE(M)- <i>SIUBC8</i>         |
| SI-UBC9-XhoI-F    | CACCCTCGAGATGGCATCCAAGAGGATTCTG     | SI- <i>UBC9</i> ORF cloning for constructing pSPYCE(M)- <i>SIUBC9</i>         |
| SI-UBC9-SmaI-R    | CCCGGGACCCATTGCATACTTTTGGG          | SI- <i>UBC9</i> ORF cloning for constructing pSPYCE(M)- <i>SIUBC9</i>         |
| SI-UBC11-XhoI-F   | CACCCTCGAGATGGCATCAAGGAGAATTCAAA    | SI- <i>UBC11</i> ORF cloning for constructing pSPYCE(M)-<br><i>SIUBC11</i>    |
| SI-UBC11-SmaI-R   | CCCGGGATTCATAGCATATTTTGGGTC         | SI- <i>UBC11</i> ORF cloning for constructing pSPYCE(M)-<br><i>SIUBC11</i>    |
| SI-UBC28-XhoI-F   | CACCCTCGAGATGGCTTCTAAGCGGATATTG     | SI- <i>UBC28</i> ORF cloning for constructing pSPYCE(M)-<br><i>SIUBC28</i>    |
| SI-UBC28-SmaI-R   | CCCGGGACCCATAGCATACTTCTGGG          | SI- <i>UBC28</i> ORF cloning for constructing pSPYCE(M)-<br><i>SIUBC28</i>    |
| SI-UBC29-XhoI-F   | CACCCTCGAGATGGCATCCAGGAGAATTCAAAAAG | SI- <i>UBC29</i> ORF cloning for constructing pSPYCE(M)-<br><i>SIUBC29</i>    |
| SI-UBC29-SmaI-R   | CCCGGGGTTTCATGGCATACTTTTGGAG        | SI- <i>UBC29</i> ORF cloning for constructing pSPYCE(M)-<br><i>SIUBC29</i>    |
| SI-UBC30-XhoI-F   | ggtaccctcgagATGGCTTCCAAGCGGATC      | SI- <i>UBC30</i> ORF cloning for constructing pSPYCE(M)-<br><i>SIUBC30</i>    |
| SI-UBC30-SmaI-R   | GGGctcgagGCCCATGGCATACTTCTGGG       | SI- <i>UBC30</i> ORF cloning for constructing pSPYCE(M)-<br><i>SIUBC30</i>    |
| SI-UBC31-XhoI-F   | CACCCTCGAGATGGCTTCGAAACGGATATTG     | SI- <i>UBC31</i> ORF cloning for constructing pSPYCE(M)-<br><i>SIUBC31</i>    |

|                 |                                 |                                                         |
|-----------------|---------------------------------|---------------------------------------------------------|
| SI-UBC31-SmaI-R | CCCGGGACCCATTGCATATTTCTGGG      | SI-UBC31 ORF cloning for constructing pSPYCE(M)-SIUBC31 |
| SI-UBC38-XhoI-F | CACCCTCGAGATGGCGTCCAAGCGGATTCTG | SI-UBC38 ORF cloning for constructing pSPYCE(M)-SIUBC38 |
| SI-UBC38-SmaI-R | CCCGGGACCCATGGCGTACTTTTGGG      | SI-UBC38 ORF cloning for constructing pSPYCE(M)-SIUBC38 |
| SI-UBC39-XhoI-F | CACCCTCGAGATGGCGTCAAGCGCATATTG  | SI-UBC39 ORF cloning for constructing pSPYCE(M)-SIUBC39 |
| SI-UBC39-SmaI-R | CCCGGGTCCCATCGCATATTTTGGAG      | SI-UBC39 ORF cloning for constructing pSPYCE(M)-SIUBC39 |
| SI-UBC40-XhoI-F | CACCCTCGAGATGGCGTCAAGAGGATATTG  | SI-UBC40 ORF cloning for constructing pSPYCE(M)-SIUBC40 |
| SI-UBC40-SmaI-R | CCCGGGTCCCATTGCATATTTCTGAG      | SI-UBC40 ORF cloning for constructing pSPYCE(M)-SIUBC40 |
| SIUBC8C85G-F    | GGCAGCATTgGCCTTGACATT           | SI-UBC8C85G ORF gateway cloning in pDEST15 vector       |
| SIUBC8C85G-R    | AATGTCAAGGcAATGCTGCC            | SI-UBC10C85G ORF gateway cloning in pDEST15 vector      |
| SIUBC10C85G-F   | CAATGGGAGTATAgGCTTGGAC          | SI-UBC10C85G ORF gateway cloning in pDEST15 vector      |
| SIUBC10C85G-R   | CAGTATGTCCAAGcTATACTC           | SI-UBC10C85G ORF gateway cloning in pDEST15 vector      |
